# Supplementary material for: Gene expression defines natural changes in mammalian lifespan
Source: PubMed Central journal article supplement (PMC4406664; doi:10.1111/acel.12283), 2015-02-09
Supplement: acel0014-0352-sd7.pdf [file acel0014-0352-sd7.pdf]

# Supplementary Information

|                                                                                                                                              |    |
|----------------------------------------------------------------------------------------------------------------------------------------------|----|
| Supplementary text                                                                                                                           | 3  |
| 1. <i>Ab initio</i> proteome representation                                                                                                  | 3  |
| 2. Influence of measurement error and non-constant rate of character evolution on the $\lambda$ model                                        | 3  |
| 3. The diffusive model of gene expression evolution                                                                                          | 4  |
| 4. Application of OU model to gene expression variation                                                                                      | 4  |
| Supplementary methods                                                                                                                        | 5  |
| Mammalian phylogeny reconstruction                                                                                                           | 5  |
| Estimation of divergence time                                                                                                                | 5  |
| Definition of whole-organism life history traits                                                                                             | 6  |
| Application of the Brownian motion model to character evolution                                                                              | 6  |
| Fitting the Hansen model on gene expression                                                                                                  | 7  |
| Amino acid sequence conservation                                                                                                             | 8  |
| Label overrepresentation analysis                                                                                                            | 9  |
| Databases                                                                                                                                    | 9  |
| Supplementary references                                                                                                                     | 9  |
| Supplementary figures                                                                                                                        | 12 |
| 1. <i>De novo</i> assembled transcriptomic contigs                                                                                           | 12 |
| 2. <i>Ab initio</i> predicted peptides                                                                                                       | 13 |
| 3. Orthologous relationships inferred from <i>ab initio</i> predicted peptides                                                               | 14 |
| 4. Schematic representation of methods used for <i>de novo</i> transcriptome assembly, annotation and inferring of orthologous relationships | 15 |
| 5. Cluster heat map that shows quantitative representation of orthologs in COG                                                               | 16 |
| 6. Influence of measurement error on the $\lambda$ model                                                                                     | 17 |
| 7. Influence of non-constant evolution rate on the $\lambda$ model                                                                           | 18 |
| 8. Overlap of genes whose expression variation associate with life histories                                                                 | 19 |
| 9. The diffusive model of transcriptome evolution                                                                                            | 20 |
| 10. Distribution of transcripts with $\lambda > 0.95$ across gene expression levels                                                          | 21 |
| 11. Macroevolution of gene expression modeled with the OU process                                                                            | 22 |
| 12. Summary on genes and models explaining interspecies expression variation                                                                 | 23 |
| 13. A cluster map that shows biological pathways associated with life histories                                                              | 24 |
| 14. Genes encoding enzymes of carbohydrate degradation pathway                                                                               |    |

|                                                                                                                         |    |
|-------------------------------------------------------------------------------------------------------------------------|----|
| are differentially expressed in liver                                                                                   | 26 |
| 15. Gene expression variation associated with tryptophan metabolism in liver                                            | 28 |
| 16. Gene expression variation associated with lysine metabolism in liver                                                | 30 |
| 17. Gene expression variation associated with valine metabolism in liver                                                | 32 |
| 18. Gene expression variation associated with fatty acid metabolism in liver                                            | 34 |
| 19. Gene expression variation associated with the peroxisome proliferator pathway in liver                              | 36 |
| 20. Gene expression variation associated with peroxisome negatively correlates with life history variation in liver     | 38 |
| 21. Gene expression variation associated with AMPK signaling negatively correlates with life history variation in liver | 40 |
| 22. Overlap of genes whose expression variation associates with life histories and residuals                            | 41 |
| 23. Within species FPKM variation                                                                                       | 42 |
| 24. Normalization of liver RNA-seq samples                                                                              | 43 |
| 25. Variation between in-house and database RNA-seq data                                                                | 44 |
| 26. Variation between FPKM produced from genomic and <i>de novo</i> contig RNA-seq read alignments                      | 45 |
| Supplementary tables                                                                                                    | 46 |
| 1. Classification and sampling sources of 33 mammals                                                                    | 47 |
| 3. Statistics on <i>de novo</i> assembled RNA contigs for 12 mammals                                                    | 48 |
| 4. Characteristics of <i>ab initio</i> predicted coding sequences and peptides for 12 mammals                           | 49 |
| 5. The numbers of orthologs in COG                                                                                      | 50 |
| 6. Life histories of 33 mammals                                                                                         | 51 |
| 7. Lambda parameter estimates and associated statistics for life histories                                              | 52 |
| 8. Statistics for genes whose expression variation is consistent with the BM model                                      | 53 |
| 9. Statistics for genes whose expression variation is consistent with the OU model                                      | 54 |

### **Ab initio proteome representation**

For 12 mammalian organisms with no available genome sequences, we predicted collections of *ab initio* polypeptides expressed in the liver, kidney and brain (Table S4) based on *de novo* assembled transcriptomic contigs (Table S3). We inferred functional annotations of *ab initio* predicted proteins from sequence similarities with Ensembl peptides using Inparanoid (Fig. S4). This software has strict rules in defining of orthologous relationship between candidate sequences (i.e. size of homologous region should exceed 70% of lengths of both candidate proteins) (Ostlund *et al.*, 2009). There is a strong overlap between predicted orthologs indicating qualitative consistence of gene sets expressed in the three organs (Fig. S3). Overall, ~90% of *ab initio* predicted peptides exhibited consistent orthology relationships among 12 organisms indicating robustness of the methodology used in the study (Fig. S4). These sequences provided a snapshot of proteomes expressed in the three tissues and were used for biological analysis and classification.

Distribution of predicted peptide sizes is shown in Fig. S2. Visual examination showed that it follows non-uniform skewed distribution. Such a deviation from normality may indicate selection for polypeptides of shorter sizes over longer sequences, which is consistent with the current view of evolution of eukaryote proteomes (Kurland *et al.*, 2007; Brocchieri & Karlin *et al.*, 2005; Frith *et al.*, 2006; Wang *et al.*, 2011). Recent comparative studies on eukaryote proteomes revealed evolution constraints shaping protein size distribution and selection for shorter polypeptides encoded in the genome (Kurland *et al.*, 2007; Brocchieri & Karlin *et al.*, 2005; Wang *et al.*, 2011). For example, gamma-distributed protein sizes of mouse, human and other eukaryotic species are centered on 300-400 amino acids (Frith *et al.*, 2006). Small sequences (less than 100 amino acids) were reported to play important role in regulation (Frith *et al.*, 2006). Therefore, short *ab initio* predicted sequences with sizes greater than 50 amino acids were also used in downstream analyses.

### **Influence of measurement error and non-constant rate of character evolution on the $\lambda$ model**

We simulated character evolution evolving under the stochastic process and examined the influence of uncorrelated variations on the  $\lambda$  parameter (Fig. S6). The assumption that the measurement error is independent was reasonable because of heteroskedasticity of variance between the samples. Incorporation of measurement error improved accuracy of the method because error and the  $\lambda$  model have exactly the same effect on the distribution of variation among species (Fig. S6).

We then simulated non-linearity in character evolution to ensure that the  $\lambda$  model can overcome evolution rate saturation at large phylogenetic distances (Fig. S7). We transformed branch lengths of the original phylogenetic tree using  $\delta$  tree transformation approach (Pagel, 1999) aimed at generating trees spanning a range of stemminess.  $\delta > 1$  increases the height of external nodes simulating character evolution on the tips of the tree, whereas  $\delta < 1$  increases the height of internal nodes increasing tree stemminess that corresponds to evolution on the root of the tree. For each tree topology, we simulated ~1,800 independently evolving traits under the diffusive model of evolution, and tested the  $\lambda$  model for these traits on untransformed tree topology. The results indicated that variability in rates of character

evolution over phylogenetic distance had a minor effect on the  $\lambda$  model for traits evolving in a Brownian fashion (Fig. S7).

### **The diffusive model of gene expression evolution**

By applying the  $\lambda$  model to transcript levels of common orthologs and appropriate phylogenetic subtrees, we identified a range of transcripts with  $\lambda > 0.95$  in the three organs (Fig. S9A, Table S8). Because the  $\lambda$  model is robust to moderate differences in the model of trait evolution, we could identify the transcript sets whose expression levels diversified in agreement with phylogeny under minor or no additional constraints.

By examining the identified gene sets, we found that kidney and brain substantially overlap (more than 30% overlapped transcripts from 1,994 and 2,346 identified in the kidney and brain, respectively), whereas liver was quite distant from them (Fig. S9B). The data suggested that even at the relaxed threshold conditions (alternative hypothesis,  $P < 0.05$ ) interspecies expression variation of ~17% transcripts in the kidney and brain and ~6% in the liver could be explained by stochastic model (Table S8), while the remaining part of the transcriptome evolved with varying degree of independence from phylogeny (Fig. S9C). The proportions are preserved across the whole range of gene expression levels with minor deviations suggesting independence of the estimates from within species gene expression variation (Fig. S10).

To evaluate whether our results were sensitive to the choice of evolutionary model, we also compared the likelihoods of the  $\lambda$  model with likelihoods of other models, such as single optimum Ornstein-Uhlenbeck (OU) model (Butler & King, 2004), which approximates stochastic evolution with a constraining force due to stabilizing selection. However, we did not observe significant improvements over the BM process for the reported transcript sets. Overall, the data indicated that transcript profiles experienced distinct constraints across heterologous mammalian organs and that neutral drift does not explain interspecies expression variation of numerous transcripts.

### **Application of the OU model to gene expression variation**

We used the multi optimum OU process (Hansen model) to model ancestor states of gene expression and unravel putative stabilizing regimes operating on transcript levels. Ancestor state corresponds to a situation when gene expression variation resembles a central tendency, so that transcript levels are pulled back toward some optimal value. In the absence of selective constraints, transcript levels may further evolve under the diffusive process. However, because mammals feature unique phenotypic adaptations one would expect selective constraints that shaped interspecies gene expression variation.

We initially fitted the two-optimum OU model to gene expression variation and distinct branch segments on the tree (Fig. S11A). Starting from chronologically most ancient ancestor and ending on the most recent one, we detected varying numbers of transcripts whose expression resembled distinct clade-specific optimum. For example, transcript levels of total of 425 genes in liver, kidney and brain could

distinguish the ancestor of Rodentia from other branches suggesting widespread accumulation of gene expression variation in child branches (Fig. S11A).

We then fitted a complete combination of OU regimes to gene expression using entire phylogeny (Monotremata, Didelphimorphia and Diprotodontia were excluded because of single species representing these orders) and classified regimes with best model likelihoods explaining the observed expression variation. We found that the two-optimum OU process is the dominant regime accounting for ~73-78% of transcripts that exhibit stabilizing constraints in liver, kidney and brain (Table S9). In the case of multiple adaptive peaks, there was a more uneven distribution, as species occupying common environmental niche tend to have their own local optima. However, multi-optimum OU regimes were rare. For example, the three-optimum OU process could explain variation in the expression of ~20-25% of the transcripts that exhibited stabilizing constraints. The two-optimum OU regimes reflect clade speciation histories (Fig. S11B). Thus, bimodal gene expression changes were accumulated sequentially during speciation and adjusted unique gene sets specific for organs and lineages (Table S9).

The results could be explained by heuristic logic, because stabilization of gene expression levels assumes continuous fixation of lineage-specific transcription optimum until species occupy a common environmental niche and escape interspecific competition. Diverse lineages feature unique environmental adaptations, and stabilizing regime acting on expression levels of specific transcripts could contribute to these adaptations.

## **Supplementary Methods**

### **Mammalian phylogeny reconstruction**

We aligned 424 common protein orthologs of 33 mammals with Muscle v3.8 (Edgar, 2004) and produced a concatenated gap-free alignment with Gblocks v0.91 (Castresana, 2000). Respective genes were then examined using PAML (Yang, 2007) for positive selection (M1a and M2a hypotheses) to validate that the encoded products exhibited nearly neutral evolution across branches. Species phylogeny was then reconstructed with the Neighbor-Joining method. The reliability of branching patterns was assessed in 1,000 bootstrapping replications using Mega 5.1 (Kumar *et al.*, 2008) and PAML software.

### **Estimation of divergence time**

For the concatenated multiple amino acid sequence alignment, we used a calibration range 150-210 Mya for the divergence time. This range appears to be the most reliable for the divergence date between human and platypus, the most distant species in the dataset (Kumar & Subramanian, 2002). To calculate divergence time, we used PAML and MCMCTree (Yang, 2007) utilizing a Bayesian phylogenetic approach. The method accepts an upper and a lower bound on calibration points. Mammalian sequence evolution exhibits large rate differences within and between lineages (Kumar & Subramanian, 2002). Therefore, a global clock cannot be assumed for complex phylogenies. We used the independent substitution rate model in the reconstruction analysis. Divergence times were calculated using Whelan and Goldman (WAG) amino acid substitution matrix (Whelan & Goldman, 2005).

## Definition of whole-organism life history traits

The data on life histories were collected from the AnAge database (de Magalhaes & Costa, 2009) and literature in case of rate of oxygen consumption (Heusner, 1991; Clarke *et al.*, 2010; White & Seymour, 2003) and were cross-validated by independent sources such as PanTHERIA database. Overall, 7 life history traits were examined in the study (Table S5). AnAge database internally traces the quality of population parameters with the number of subjects that were under observation and by the quality of data source. Poorly rated data (“tiny” sizes of populations or “unacceptable” quality) were excluded from the analyses.

Maximum lifespan (*tmax*) is the maximum time interval from birth to death documented for a given population of organisms within species. The accuracy of *tmax* depends on sample size being under observation and, therefore, the precision of the estimate may vary among lineages. The best estimate of *tmax* is available for human populations. *tmax* exhibits strong relationships with other traits such as time to maturity (de Magalhaes *et al.*, 2007) estimated with greater precision for multitude species.

Oxygen consumption is the volume of oxygen consumed by an individual per an hour and, therefore, defines the intensity of resting (basal) metabolic rate (BMR). There is considerable correlation of BMR with body weight (White & Seymour, 2003). Thus, oxygen consumption with subtracted body weight component provides phylogeny-unrelated estimate of BMR.

## Application of the Brownian motion model to character evolution

We used the BM model, developed for analyses of numerical traits evolving along a given phylogenetic pattern, to model evolution of life histories. The BM theory assumes a linear accumulation of changes in a numerical trait over time (Boettiger *et al.*, 2012; Freckleton & Harvey, 2006). For particular values at ancestral nodes, the likelihood (*L*) of observing a set of phenotypic data for a single character at the tips of ultrametric phylogenetic tree can be represented as:

$$L = \prod \frac{1}{\sqrt{2\pi(v_{n1} + v_{n2})}} \exp\left[-\frac{(x_{n1} - x_{n2})^2}{2(v_{n1} + v_{n2})}\right]$$

where *L* is the product over all nodes on the tree; *n* indicates a particular node and *N* is the total number of nodes (Freckleton & Harvey, 2006). The term  $(x_{n1} - x_{n2})$  is the difference in trait values at two descendents of each node *n*.  $v_{n1}$  and  $v_{n2}$  are variance values derived from the branch lengths of the phylogeny in units of expected amount of time available for phenotypic change along branches of the tree.

Several approaches have been proposed for estimation of the likelihood parameter (Blomberg *et al.*, 2003). We constructed a phylogenetic covariance from the phylogenetic tree to evaluate the BM process and calculated parameter lambda ( $\lambda$ ).  $\lambda$  is a branch length scaling parameter that allowed to range from 0 to 1 (Pagel, 1999). With the tree in this variance-covariance matrix form,  $\lambda$  scales the off-diagonal elements of the matrix by the amount of coefficient. It moves from 1 to 0 the shorter the internal branches. The final tree is a star-like with all branches emanating from a common node. When  $\lambda = 1$ , there was no transformation that corresponds to the BM of the trait along the phylogenetic pattern. When

$\lambda = 0$ , co-variances are zero, corresponding to random noise. A star-like tree reflects less phylogenetic structure, that is, less phylogenetic signal.

To test the significance of the  $\lambda$  model we estimated log-likelihoods of the BM model for original (where it is allowed to take its maximum value) and star-like topologies and calculated the ratio between log-likelihoods of these models and the  $\lambda$  model. The probability that the observed value of  $\lambda$  differs from random distribution and the probability of deviation from the BM process were then estimated using chi-squared distributions (Pagel, 1999).

We accounted for a measurement error in the data (Supplementary Information, Fig. S6). The sources of measurement error include sampling variation, variation related to age, sex, season, etc. Although estimating the total measurement error (e.g., the variation among all populations of a species) is unrealistic, incorporating the measurement error associated with the observations provides substantial improvement to the method (Ives *et al.*, 2007).

Under the  $\lambda$  model the multivariate distribution of tip values is  $x \sim \sigma^2 C_\lambda$ , where  $C_\lambda$  is an  $n \times n$  matrix for  $n$  species containing, in the diagonal, the height of each species above the root, and in each off-diagonal element  $C_\lambda(i,j)$ , the height above the root node of the most common recent ancestor of species  $i$  and  $j$  multiplied by the coefficient  $\lambda$ . With measurement error  $x \sim \sigma^2 C_\lambda + E$ , where  $E$  is a diagonal matrix containing the square of the estimation error for each species and  $E \sim \sigma_m^2 M$ . The variance due to measurement error  $M$  of trait  $x$  for species  $i$  is  $\sigma_m^2 m_{ij}$  where  $m_{ij}$  is the  $i$ -th diagonal element of  $M$ . Therefore, the distribution of tip values among species is:

$$x = a + \varepsilon + \eta, \varepsilon + \eta \sim \sigma^2 C_\lambda + \sigma_m^2 M$$

where  $x$  is a  $N \times 1$  vector containing the observed values of the trait,  $a$  is a scalar giving the expected value of the trait,  $\varepsilon$  is a  $N \times 1$  vector of zero-mean error terms depicting the evolutionary variance of the trait among species, and  $\eta$  is the  $N \times 1$  vector of errors associated with measurement (Ives *et al.*, 2007).

### Fitting the Hansen model on gene expression

Adaptive evolution of trait  $X$  (transcription levels of each single gene for a set of species) was modeled as an OU process with stepwise Akaike Information Criterion (Ingram *et al.*, 2013). In OU process, lineages in distinct selective regimes are limited to certain optima of  $X$  assuming that  $X$  follows a multivariate normal distribution. Under the OU process, a continuous character evolves as following:

$$dX(t) = \alpha[\theta - x(t)]dt + \beta dW(t)$$

where  $\beta$  defines the magnitude of the diffusion process over time interval  $dt$ , the Brownian rate parameter.  $dW(t)$  is Wiener process (noise) following uniform distribution. Parameter  $\alpha$  defines the strength of adaptive evolution attracting local optimum to value  $\theta$ .

The regime shifts were sequentially added to the initial OU model in which the entire tree is in a single regime. Maximum likelihood was then calculated to estimate OU parameter values and likelihoods of the model ( $L$ ). The performance of each new model was estimated using the Akaike information criterion (AIC) (Boettiger *et al.*, 2012; Harmon *et al.*, 2010):

$$AIC_c = -2\log(L) + 2p + \left( \frac{2p(p+1)}{N-p-1} \right)$$

where N is number of trait values and p is number of parameters in the Hansen model. The improvements of each new model was defined as  $\Delta AIC_{c(i)} = AIC_{c(i)} - AIC_{c(j)}$ , the difference between AIC of the *i*-th model from the *j*-th one. Monte Carlo simulations were also used to determine whether each *i*-th model had statistically significant improvement over *j*-th treated as the null model (Boettiger *et al.*, 2012). Fitting of candidate models was repeated until no candidate model exceed the criterion  $\Delta AIC_{c(i)} < \Delta AIC_{c(j)}$ , indicating that the new model did not provide significant improvements over the existing one. The regimes corresponding to the best models were retained through the iterations.

Candidate regimes were then collapsed by evaluating all pairwise combinations of regimes *i* and *j*, and calculating OU parameters for the model.  $\Delta AIC_{c(ij)}$  was then calculated for each of  $k(k-1)/2$  candidate models to determine which model meets the criterion  $\Delta AIC_{c(ij)} < \Delta AIC_c$ . The criterion indicates that the model was improved when regimes *i* and *j* were collapsed. The convergence of the final model was defined as  $\Delta k = k - k'$ , representing the simplification of convergent model (decrease in the number of regimes) over the collapsed models (Ingram *et al.*, 2013).

### Amino acid sequence conservation

The analysis of conservation aims to identify positions in a protein sequence which are conserved within each orthologous population that acquires this sequence. Such analysis also provides information about selection pressure acting across diverse protein groups and classes.

Conservation of a particular amino acid residue is defined as the average of the similarity scores of all pairwise comparisons for that position in the alignment, whereas the similarity score between any two residues is the score value between these residues in the chosen substitution matrix. An average conservation score for a group of amino acid sequences is a per residue similarity adjusted by the number of informative amino acids in the alignment.

The degree of evolutionary conservation within a family of homologous sequences was measured by Shannon's information entropy for a particular orthologous group:

$$S(l) = - \sum_{i=1}^6 P_i(l) \log P_i(l)$$

where  $P_i(l)$  is the frequency of each of the six classes *i* of residues at position *l* in the multiple sequence alignment (Mirny & Shakhnovich, 1999). The six classes of residues are: aliphatic (AVLIMC), aromatic (FWYH), polar (STNQ), positive (KR), negative (DE), and special (reflecting their special conformational properties) (GP). In addition to conservation,  $S(l)$  also reflects the level of amino acid substitutions between and within homologous sequences. A low value of the intrafamily conservation  $S(l)$  indicates that the particular amino acid position was under evolutionary pressure to keep a certain type of residue.

An average level of amino acid sequence diversity per amino acid residue for a particular orthologous group of sequences can be calculated as follows:



$$S = \frac{\sum_{k=1}^N S(I)}{N}$$

where  $S(I)$  is an information entropy for  $I$ -th residue and  $N$  is the number of informative amino acids in the alignment. The union  $\{S_1, S_2 \dots S_k\}$  provides an estimate of evolution conservation and divergence for a custom class of  $k$  orthologs.

### Label overrepresentation analysis

Label overrepresentation (gene set enrichment) analysis for functional annotation, ontology and pathways were done using standard right-sided hypergeometric test employing all genes on the array as denominator and genes under interest as numerator (Huang da *et al.*, 2009).  $P$ -values were corrected by the Benjamini-Hochberg FDR-controlling procedure.

### Databases

For pathway and gene ontology analyses, we used latest builds of CPDB (Kamburov *et al.*, 2009) and gene ontology consortium databases (Ashburner *et al.*, 2000), respectively. CPDB is a comprehensive database of biochemical pathways that accumulates data from KEGG, Reactome, HumanCyc and related sources. Electronically inferred GO annotations (RCA, IEA, NR and ND codes) were excluded from gene ontology enrichment analyses. Protein-protein interactions were obtained from CPDB and STRING 9.0 (Szklarczyk *et al.*, 2010). Only highly confident interactions as defined by the original sources were used in biological network analyses.

### Supplementary references

- Ashburner M, Ball CA, Blake JA, Botstein D, Butler H, Cherry JM, Davis AP, Dolinski K, Dwight SS, Eppig JT, Harris MA, Hill DP, Issel-Tarver L, Kasarskis A, Lewis S, Matese JC, Richardson JE, Ringwald M, Rubin GM, Sherlock G (2000). Gene ontology: tool for the unification of biology. The Gene Ontology Consortium. *Nat Genet.* 25, 25-29.
- Blomberg SP, Garland T, Jr., Ives AR (2003). Testing for phylogenetic signal in comparative data: behavioral traits are more labile. *Evolution.* 57, 717-745.
- Boettiger C, Coop G, Ralph P (2012). Is your phylogeny informative? Measuring the power of comparative methods. *Evolution.* 66, 2240-2251.
- Brocchieri L, Karlin S (2005). Protein length in eukaryotic and prokaryotic proteomes. *Nucleic acids research.* 33, 3390-3400.
- Butler MA, King AA (2004) Phylogenetic comparative analysis: a modeling approach for adaptive evolution. *American Naturalist.* 164, 683-695.
- Castresana J (2000). Selection of conserved blocks from multiple alignments for their use in phylogenetic analysis. *Mol Biol Evol.* 17, 540-552.

- Clarke A, Rothery P, Isaac NJ (2010). Scaling of basal metabolic rate with body mass and temperature in mammals. *J Anim Ecol.* 79, 610-619.
- Edgar RC (2004). MUSCLE: multiple sequence alignment with high accuracy and high throughput. *Nucleic Acids Res.* 32, 1792-1797.
- Freckleton RP, Harvey PH (2006). Detecting non-Brownian trait evolution in adaptive radiations. *PLoS Biol.* 4, e373.
- Frith MC, Forrest AR, Nourbakhsh E, Pang KC, Kai C, Kawai J, Carninci P, Hayashizaki Y, Bailey TL, Grimmond SM (2006). The abundance of short proteins in the mammalian proteome. *PLoS genetics.* 2, e52.
- Heusner AA (1991). Size and power in mammals. *J Exp Biol.* 160, 25-54.
- Harmon LJ, Losos JB, Jonathan Davies T, Gillespie RG, Gittleman JL, Bryan Jennings W, Kozak KH, McPeck MA, Moreno-Roark F, Near TJ, Purvis A, Ricklefs RE, Schluter D, Schulte li JA, Seehausen O, Sidlauskas BL, Torres-Carvajal O, Weir JT, Mooers AO (2010). Early bursts of body size and shape evolution are rare in comparative data. *Evolution.* 64, 2385-2396.
- Huang da W, Sherman BT, Lempicki RA (2009). Bioinformatics enrichment tools: paths toward the comprehensive functional analysis of large gene lists. *Nucleic Acids Res.* 37, 1-13.
- Ingram T, Mahler DL (2013). SURFACE: detecting convergent evolution from comparative data by fitting Ornstein-Uhlenbeck models with stepwise Akaike Information Criterion. *Meth Ecol Evol.* 4, 416-425.
- Ives AR, Midford PE, Garland T, Jr. (2007). Within-species variation and measurement error in phylogenetic comparative methods. *Syst Biol.* 56, 252-270.
- Kumar S, Nei M, Dudley J, Tamura K (2008). MEGA: a biologist-centric software for evolutionary analysis of DNA and protein sequences. *Brief Bioinform.* 9, 299-306.
- Kumar S, Subramanian S (2002). Mutation rates in mammalian genomes. *Proc Natl Acad Sci U S A.* 99, 803-808.
- Kurland CG, Canback B, Berg OG (2007). The origins of modern proteomes. *Biochimie.* 89, 1454-1463.
- Kamburov A, Wierling C, Lehrach H, Herwig R (2009). ConsensusPathDB--a database for integrating human functional interaction networks. *Nucleic Acids Res.* 37, D623-628.
- de Magalhaes JP, Costa J, Church GM (2007). An analysis of the relationship between metabolism, developmental schedules, and longevity using phylogenetic independent contrasts. *J Gerontol A Biol Sci Med Sci.* 62, 149-160.
- de Magalhaes JP, Costa J (2009). A database of vertebrate longevity records and their relation to other life-history traits. *J Evol Biol.* 22, 1770-1774.
- Mirny LA, Shakhnovich EI (1999). Universally conserved positions in protein folds: reading evolutionary signals about stability, folding kinetics and function. *J Mol Biol.* 291, 177-196.
- Ostlund G, Schmitt T, Forslund K, Kostler T, Messina DN, Roopra S, Frings O, Sonnhammer EL (2009). InParanoid 7: new algorithms and tools for eukaryotic orthology analysis. *Nucleic Acids Res.* 38, D196-203.
- Pagel M (1999). Inferring the historical patterns of biological evolution. *Nature.* 401, 877-884.

- Szklarczyk D, Franceschini A, Kuhn M, Simonovic M, Roth A, Minguéz P, Doerks T, Stark M, Müller J, Bork P, Jensen LJ, von Mering C (2010). The STRING database in 2011: functional interaction networks of proteins, globally integrated and scored. *Nucleic Acids Res.* 39, D561-568.
- Wang M, Kurland CG, Caetano-Anolles G (2011). Reductive evolution of proteomes and protein structures. *Proc Natl Acad Sci U S A.* 108, 11954-11958.
- Whelan S, Goldman N (2001). A general empirical model of protein evolution derived from multiple protein families using a maximum-likelihood approach. *Mol Biol Evol.* 18, 691-699.
- White CR, Seymour RS (2003). Mammalian basal metabolic rate is proportional to body mass<sup>2/3</sup>. *Proc Natl Acad Sci U S A.* 100, 4046-4049.
- Yang Z (2007). PAML 4: phylogenetic analysis by maximum likelihood. *Mol Biol Evol.* 24, 1586-1591.

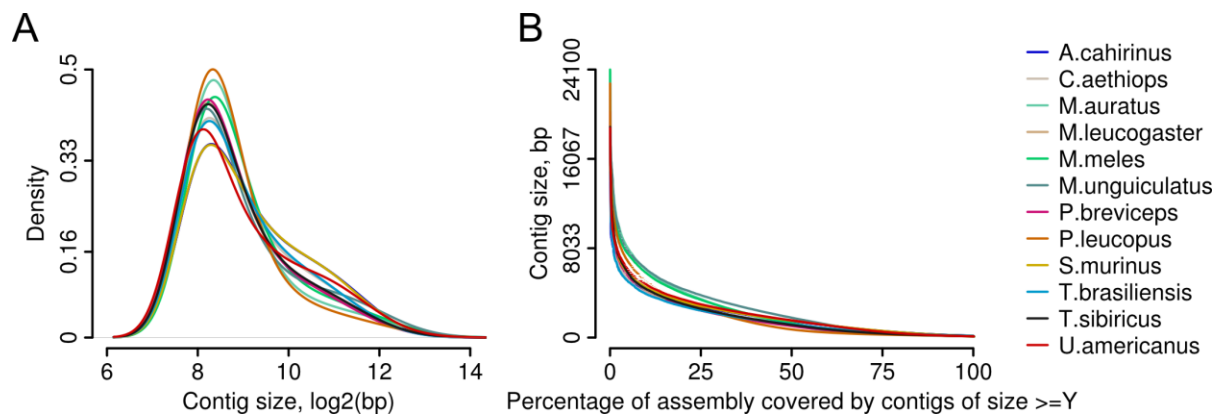

**Figure S1. *De novo* assembled transcriptomic contigs.** (A) Density of RNA-seq contig lengths. The vertical axis of a graph shows density, and the horizontal axis shows contig size (in nucleotide base pairs) in logarithmic space. (B) Contig size coverage. The vertical axis of a graph shows contig size (in nucleotide base pairs), and horizontal axis shows assembly coverage (percentage). Species are indicated in the right corner of plot.

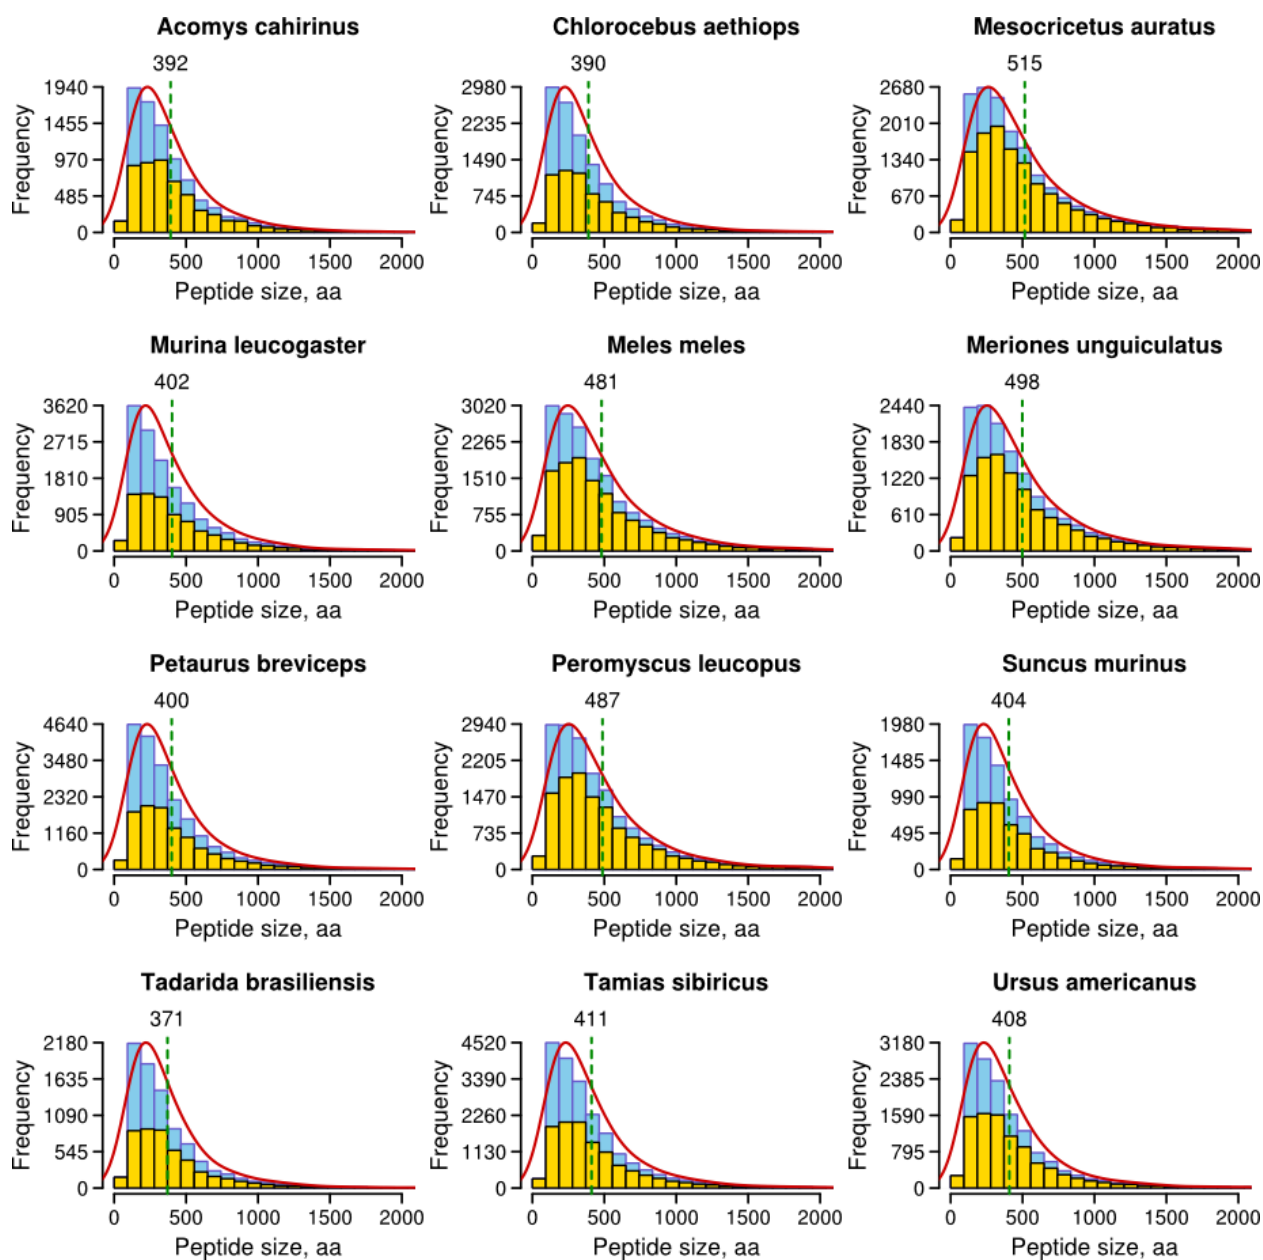

**Figure S2. *Ab initio* predicted peptides.** Each panel shows the distribution of peptide lengths for one of the indicated species (top). Blue bars denote peptides predicted from a complete set of coding sequences (CDSs). Yellow bars indicate peptides predicted from CDSs that have start and stop translation signals. Red curve is the kernel density estimate of CDS lengths. Green dashed lines with numbers at the top indicate median size of proteomes.



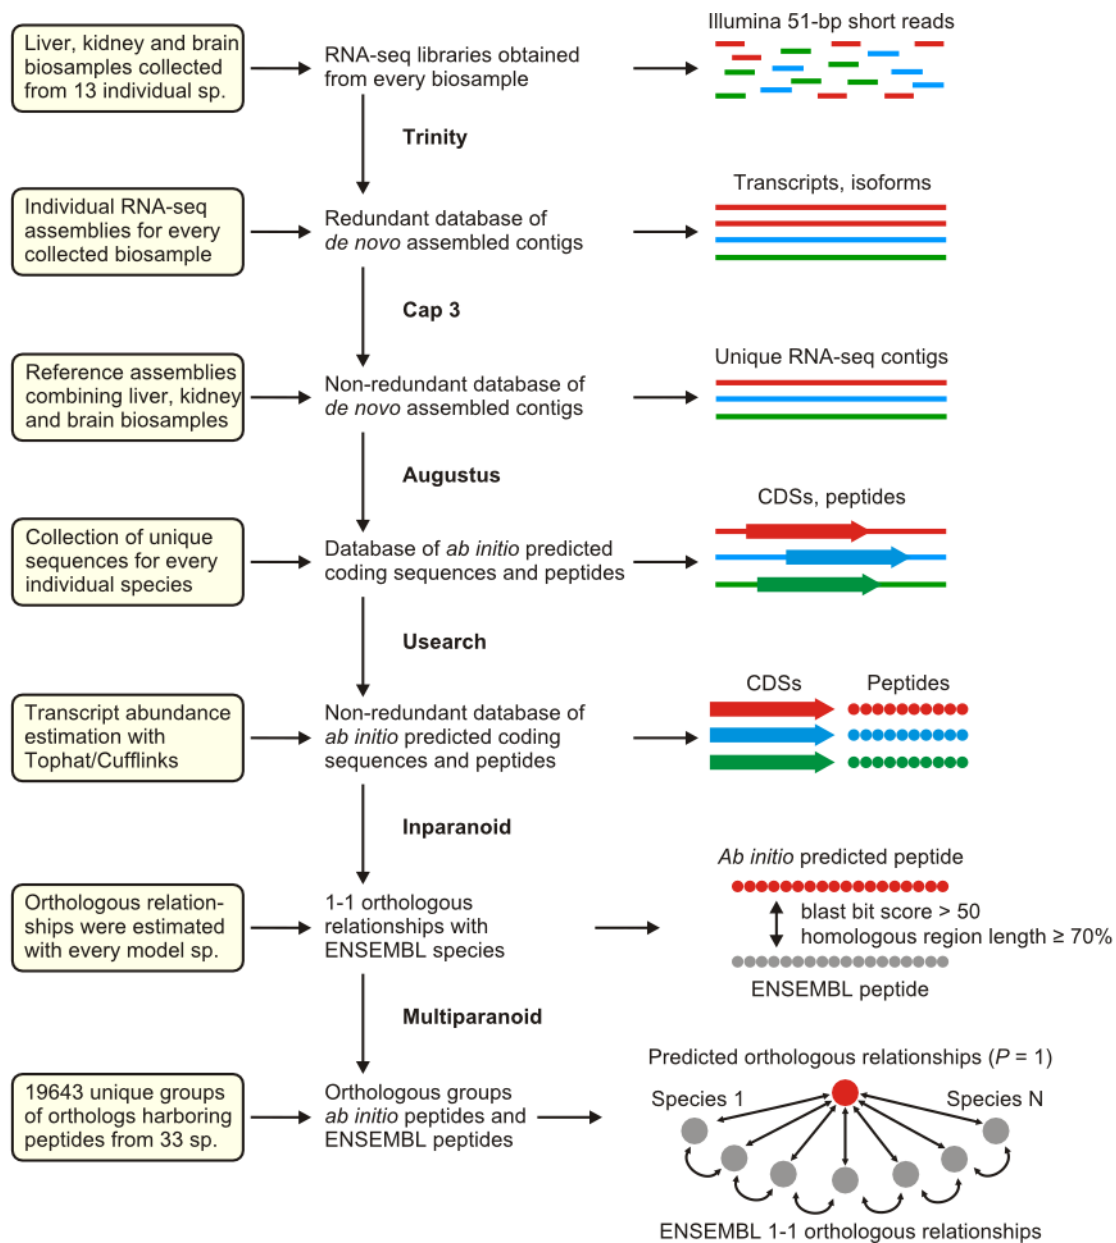

**Figure S4. Schematic representation of methods used for *de novo* transcriptome assembly, annotation and inferring of orthologous relationships.**

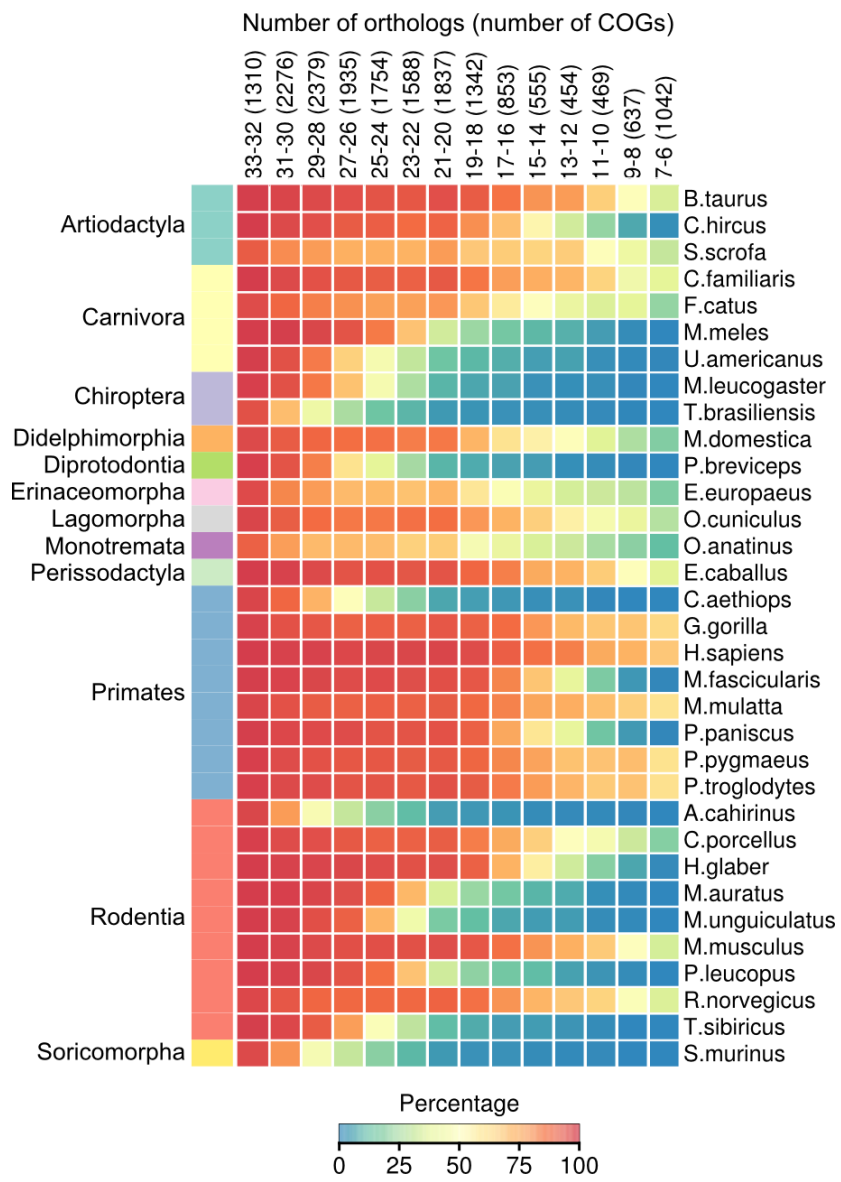

**Figure S5. Cluster heat map that shows quantitative representation of orthologs in COG.** Number of orthologs and total number of COG of particular size (in brackets) is indicated at the top of plot. Species are shown in the right corner of plot. Each colored cell denotes percentage of species-specific orthologs that belongs to COG of particular size (scale at the bottom).



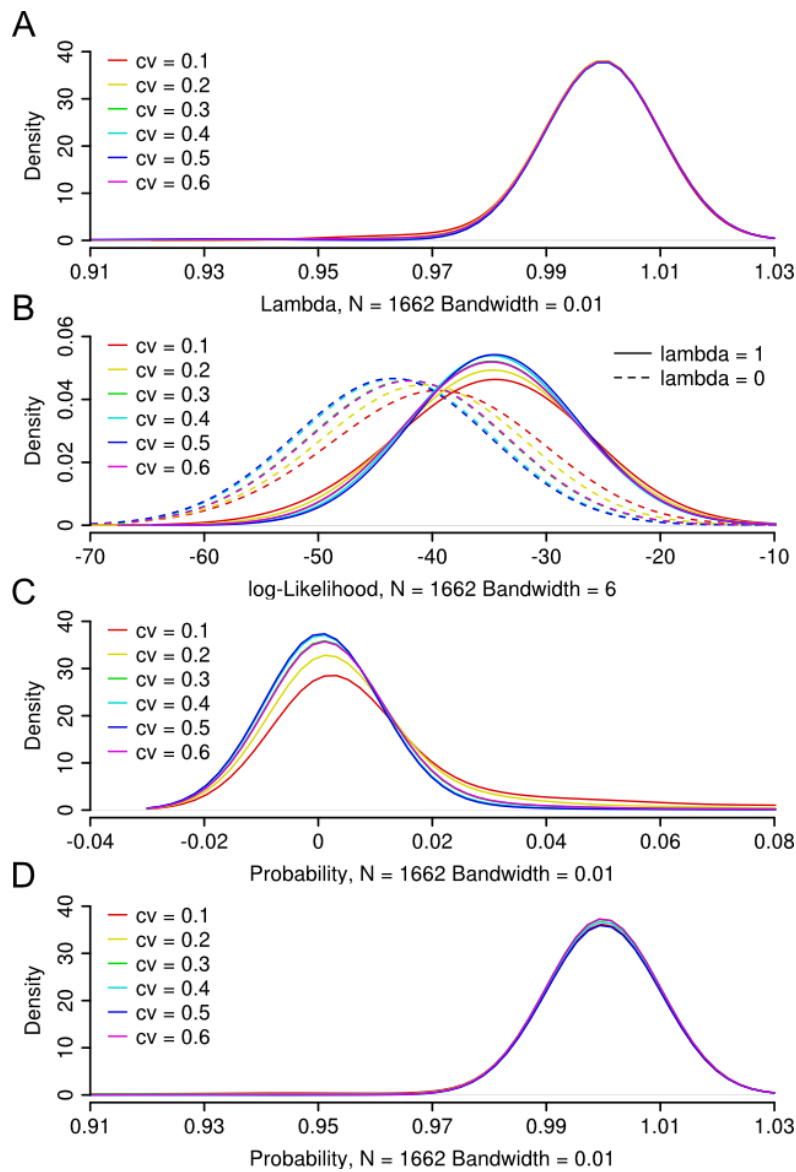

**Figure S6. Influence of measurement error on the  $\lambda$  model.** We simulated evolution of  $N = 1662$  traits under the Brownian motion. We then added fixed measurement error to traits (CV varied from 0.1 to 0.6). (A) Kernel density estimate of  $\lambda$  coefficient. Color of lines denotes CV (legend in the top left corner of plot). (B) Kernel density estimate of log-likelihoods of the  $\lambda$  model. Color-coded dashed lines correspond to log-likelihoods of the model when trait variation was compared with randomly distributed value (star-like tree topology, model M0). Solid lines correspond to log-likelihoods of the model when trait variation was compared with the BM model (untransformed tree topology, model M1). (C) Kernel density estimate of  $P$ -values. Probabilities were obtained from the likelihood-ratio tests (LRT) between log-likelihoods of the  $\lambda$  model and log-likelihoods of the M0 model. (D) Kernel density estimate of  $P$ -values. Probabilities were obtained from the LRT between log-likelihoods of the  $\lambda$  model and log-likelihoods of the M1 model. Kernel density estimates were calculated using Gaussian approximation with smoothing bandwidth indicated below each panel.

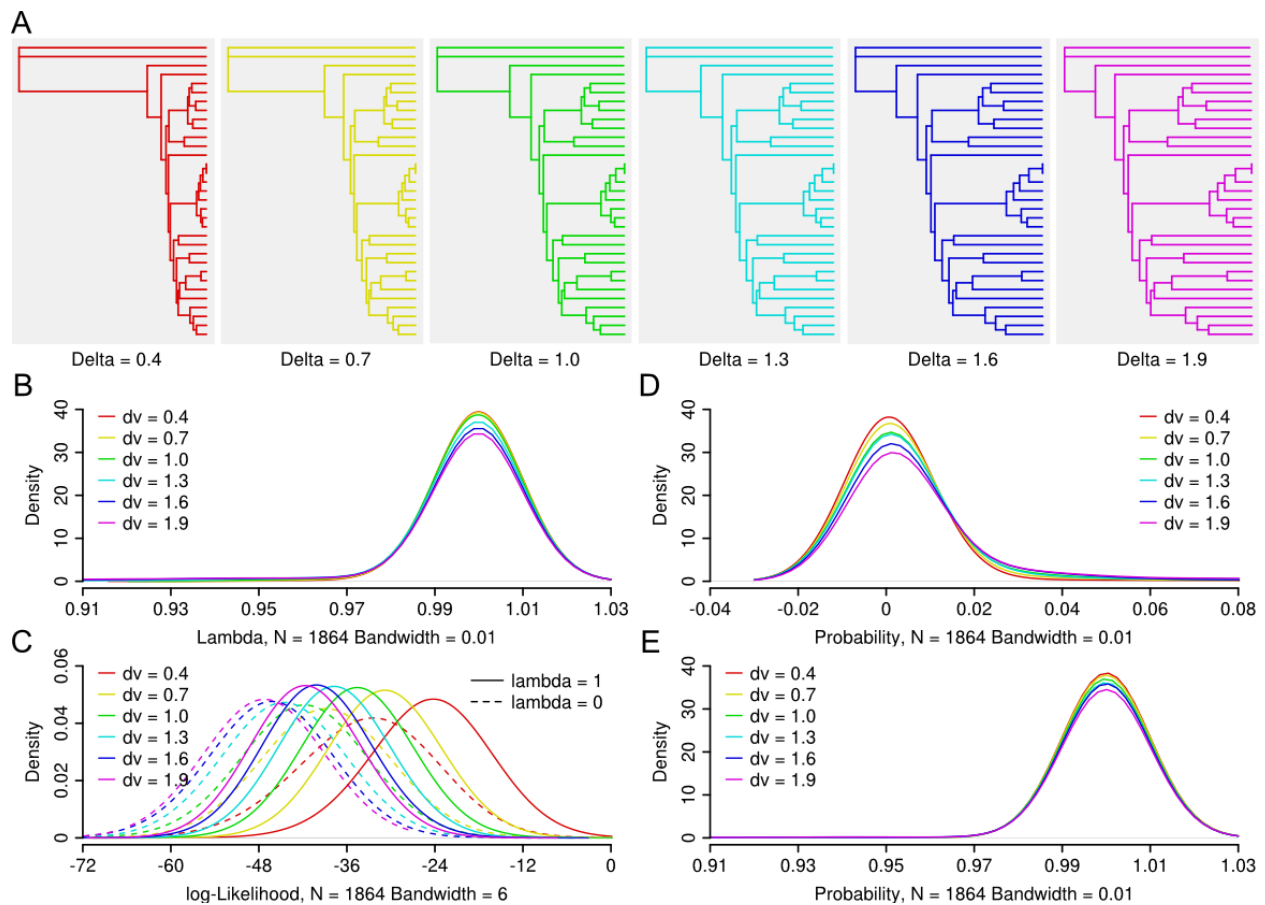

**Figure S7. Influence of non-constant evolution rate on the  $\lambda$  model.** (A) A set of trees created with  $\delta$  branch length transformation approach. For every topology we simulated  $N = 1864$  traits under the Brownian motion and tested the  $\lambda$  model against untransformed tree topology ( $\delta = 1$ ). (B) Kernel density estimate of  $\lambda$  coefficient. Color of lines denotes particular tree topology used for simulation of character evolution (legend in the top left corner of plot). (C) Kernel density estimate of log-likelihoods. Color-coded dashed lines correspond to log-likelihoods of the models when trait variation was compared with randomly distributed value (star-like tree topology, model M0). Solid lines correspond to log-likelihoods of the models when trait variation was compared with the BM model (untransformed topology, model M1). (D) Kernel density estimate of  $P$ -values. Probabilities were obtained from the likelihood-ratio tests (LRT) between log-likelihoods of the  $\lambda$  model and log-likelihoods of the M0 model. (E) Kernel density estimate of  $P$ -values. Probabilities were obtained from the LRT between log-likelihoods of the  $\lambda$  model and log-likelihoods of the M1 model. Kernel density estimates were calculated using Gaussian approximation with smoothing bandwidth indicated below each panel.

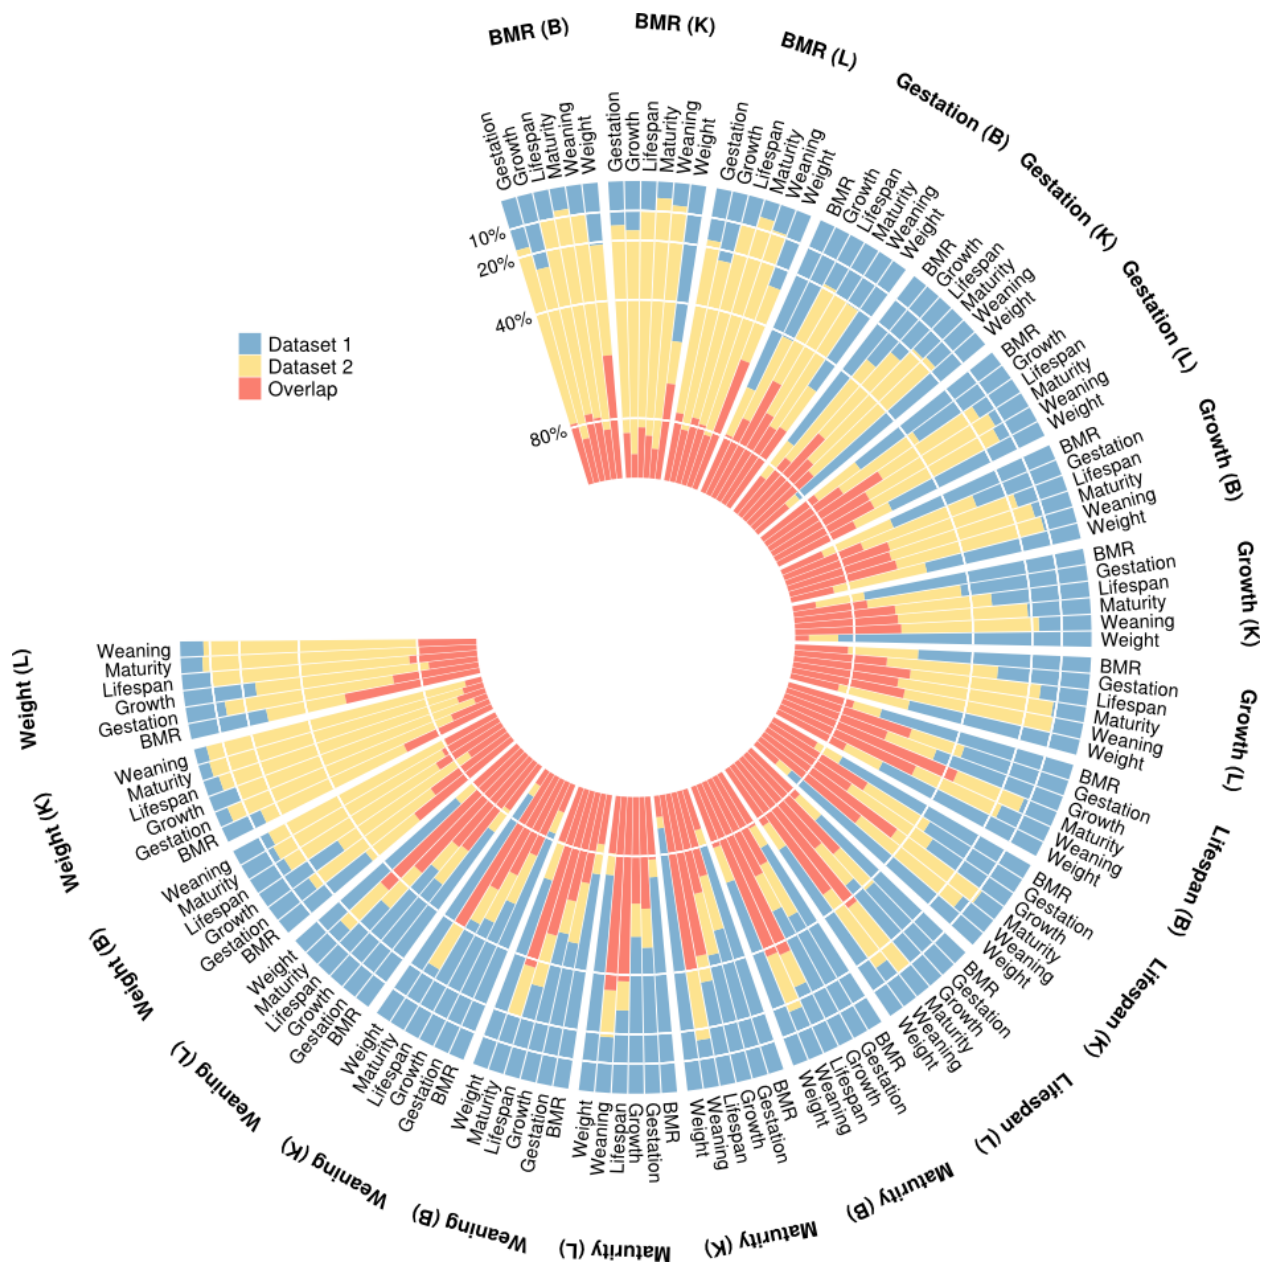

**Figure S8. Overlap of genes whose expression variation associate with life histories.** Each color-coded bar shows percentages of genes (scale at the beginning) unique for two data sets (blue, yellow) and percentage of common genes (red). L, liver; K, kidney; B, brain.

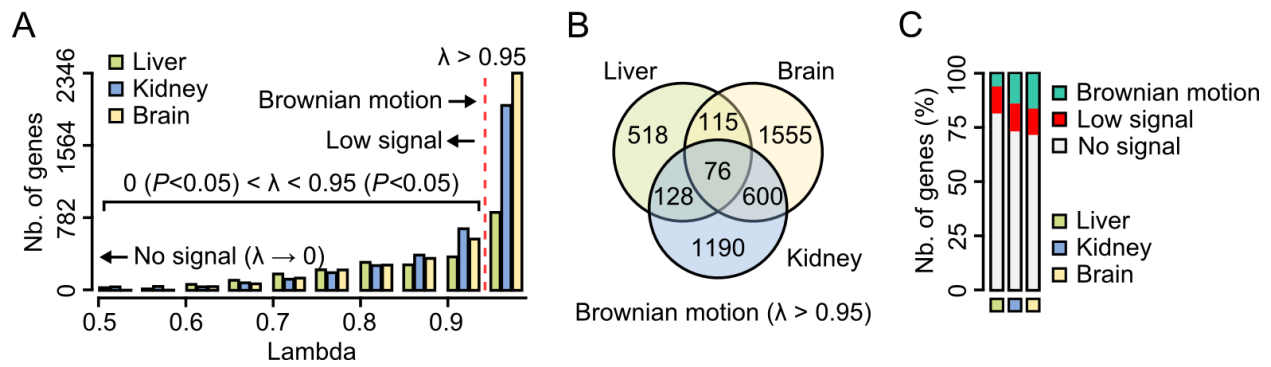

**Figure S9. The diffusive model of transcriptome evolution.** (A) Distributions of  $\lambda$  coefficients in the liver, kidney and brain. Each bar shows the numbers of genes (vertical axis) within a particular  $\lambda$  estimate (bottom axis). Red line denotes  $\lambda$  cut-off for genes whose expression variation evolved under the BM model. (B) Overlap of genes with  $\lambda > 0.95$  among the liver, kidney and brain. (C) Proportion of transcripts whose expression variation is consistent with the BM model (green) or evolved with varying degree of independence from phylogeny (red, grey).

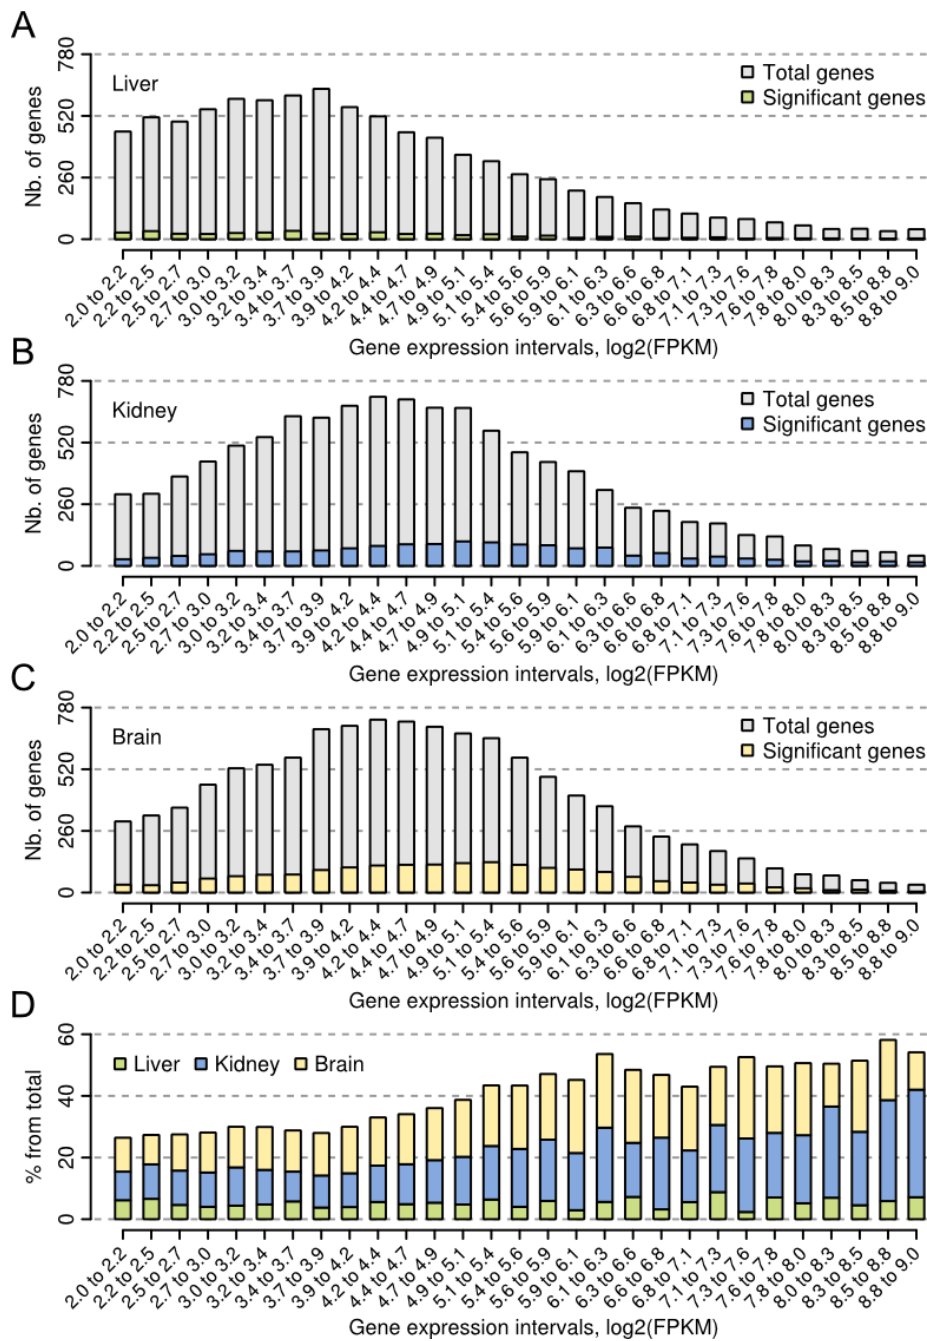

**Figure S10. Distribution of transcripts with  $\lambda > 0.95$  across gene expression levels.** (A), (B) and (C) Histogram plots show distribution of transcript numbers across a range of gene expression levels in the liver, kidney and brain, respectively. Horizontal axes denote FPKM in logarithmic space. Vertical axes show transcript number. Grey bars show all transcripts. Transcripts with  $\lambda > 0.95$  are highlighted with one of the three colors (legend in the top right corner). (D) Histogram shows distribution of transcripts with  $\lambda > 0.95$  across a range of gene expression intervals. Horizontal axes denote FPKM in logarithmic space. Vertical axis shows percentage of transcripts with  $\lambda > 0.95$  from total number of organ-specific transcripts within a particular FPKM interval.

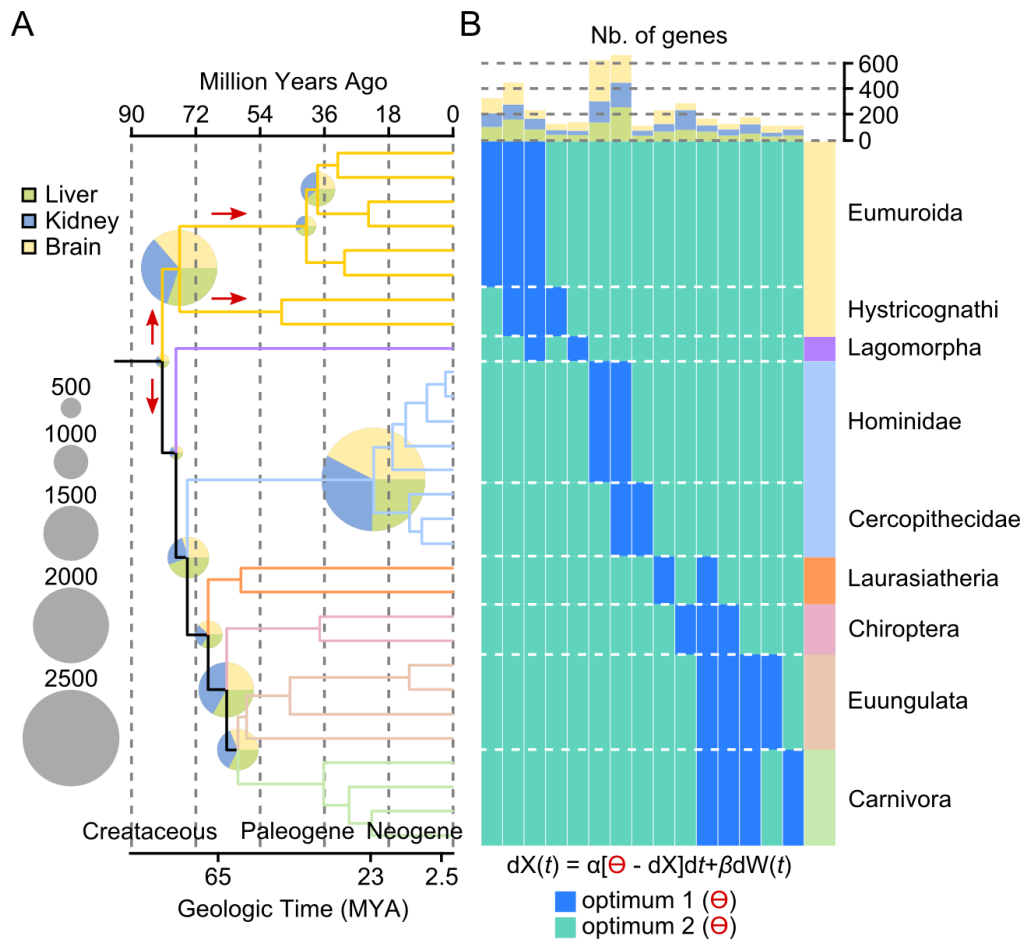

**Figure S11. Macroevolution of gene expression modeled with the OU process.** (A) Phylogeny and gene expression divergence of ancestors. Number of transcripts distinguishing child branches is shown in a pie chart with color-coded slices distinguishing organs. Grey circles in the left corner of plot denote number of transcripts corresponding to a particular pie size. (B) Patterns of gene expression variation inferred with the OU model. Colors distinguish OU optima. Numbers of genes corresponding to a particular OU regime are indicated at the top of each color-coded rectangle.



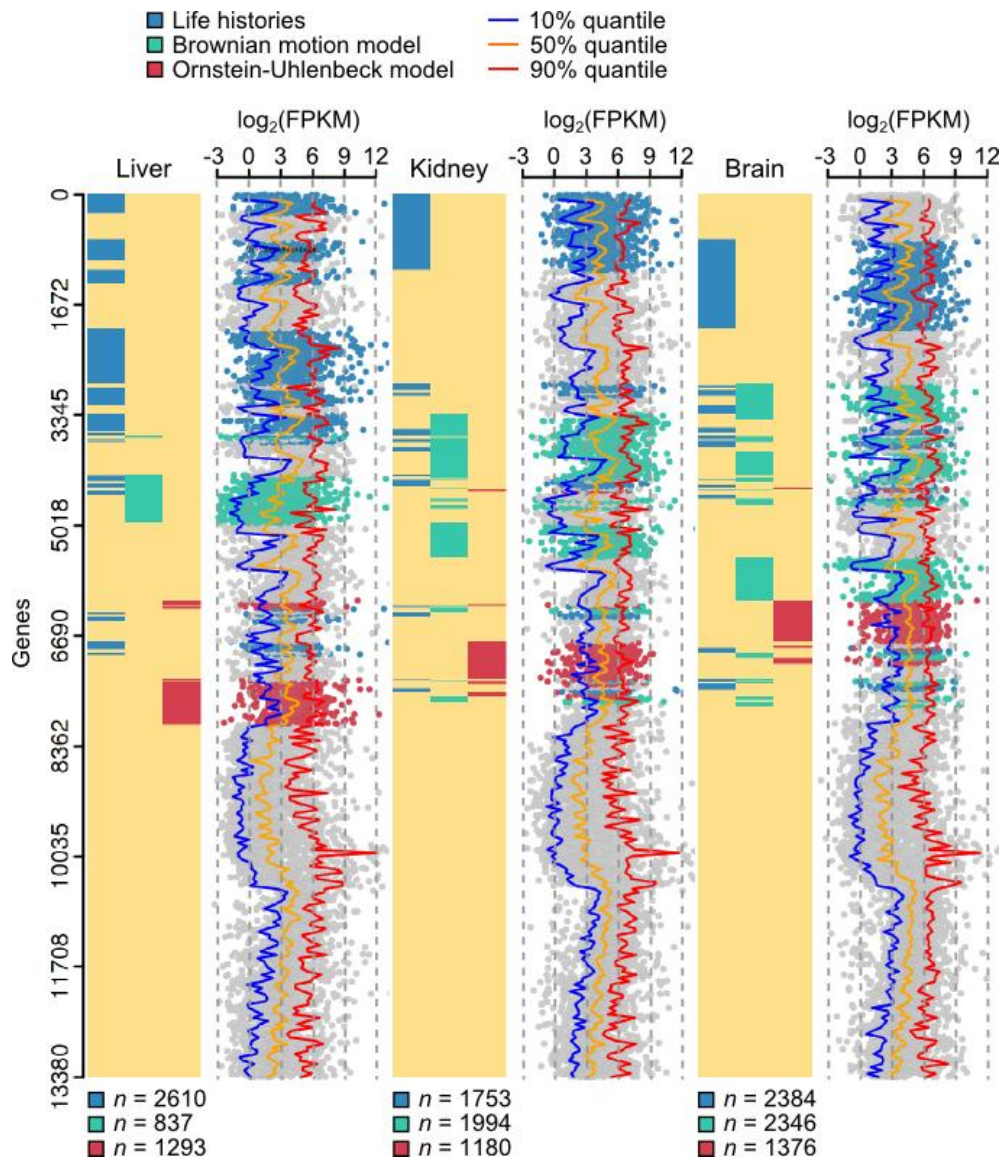

**Figure S12. Summary on genes and models explaining interspecies expression variation.** Color-coded cluster maps show a complete set of transcripts for one of the liver, kidney or brain. Colors distinguish genes whose expression variation could be explained by phylogeny (green), stabilizing constraints (red) or gradients of life history variation (blue). Total numbers of respective genes ( $n$ ) is indicated at the bottom of each plot. Graphs on the left show organ-specific transcription levels averaged between all species. Color-coded lines denote 10%, 50% and 90% quantiles of expression variation calculated over 50-gene sliding window intervals.

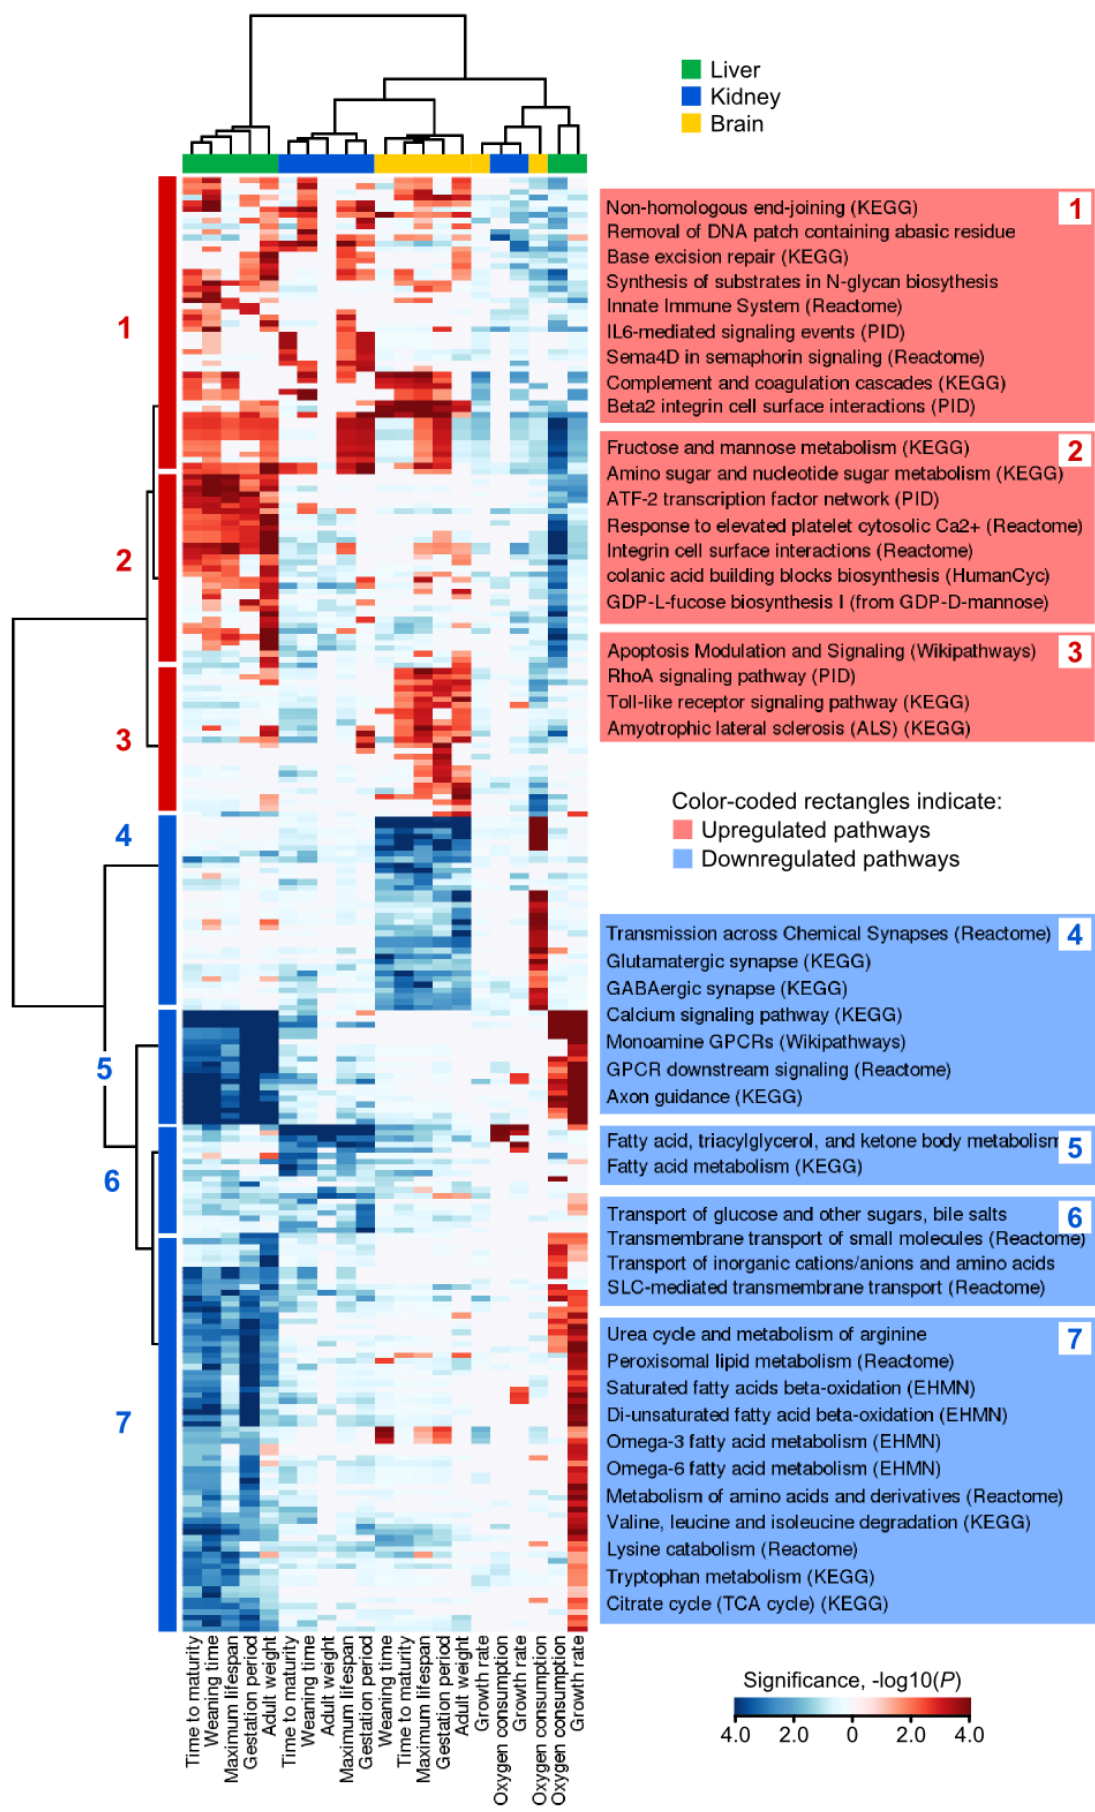



**Figure S13. A cluster map that shows biological pathways associated with life histories.** Columns on the plot correspond to life histories (bottom). Rows show pathways. Sub rectangles in red denote pathways positively correlated with life history variable. Negatively correlated pathways are in blue. Color intensities denote statistical significance of enrichment (negative logarithm of FDR-corrected  $P$ -value, bar in the bottom right corner of plot). Life histories and pathways were clustered using the Ward's method and Euclidean distance metric. Pathways were grouped into 7 clusters using constant height cutoff method (left side). Titles of representative pathways and database source (in brackets) are presented in the right corner of plot.

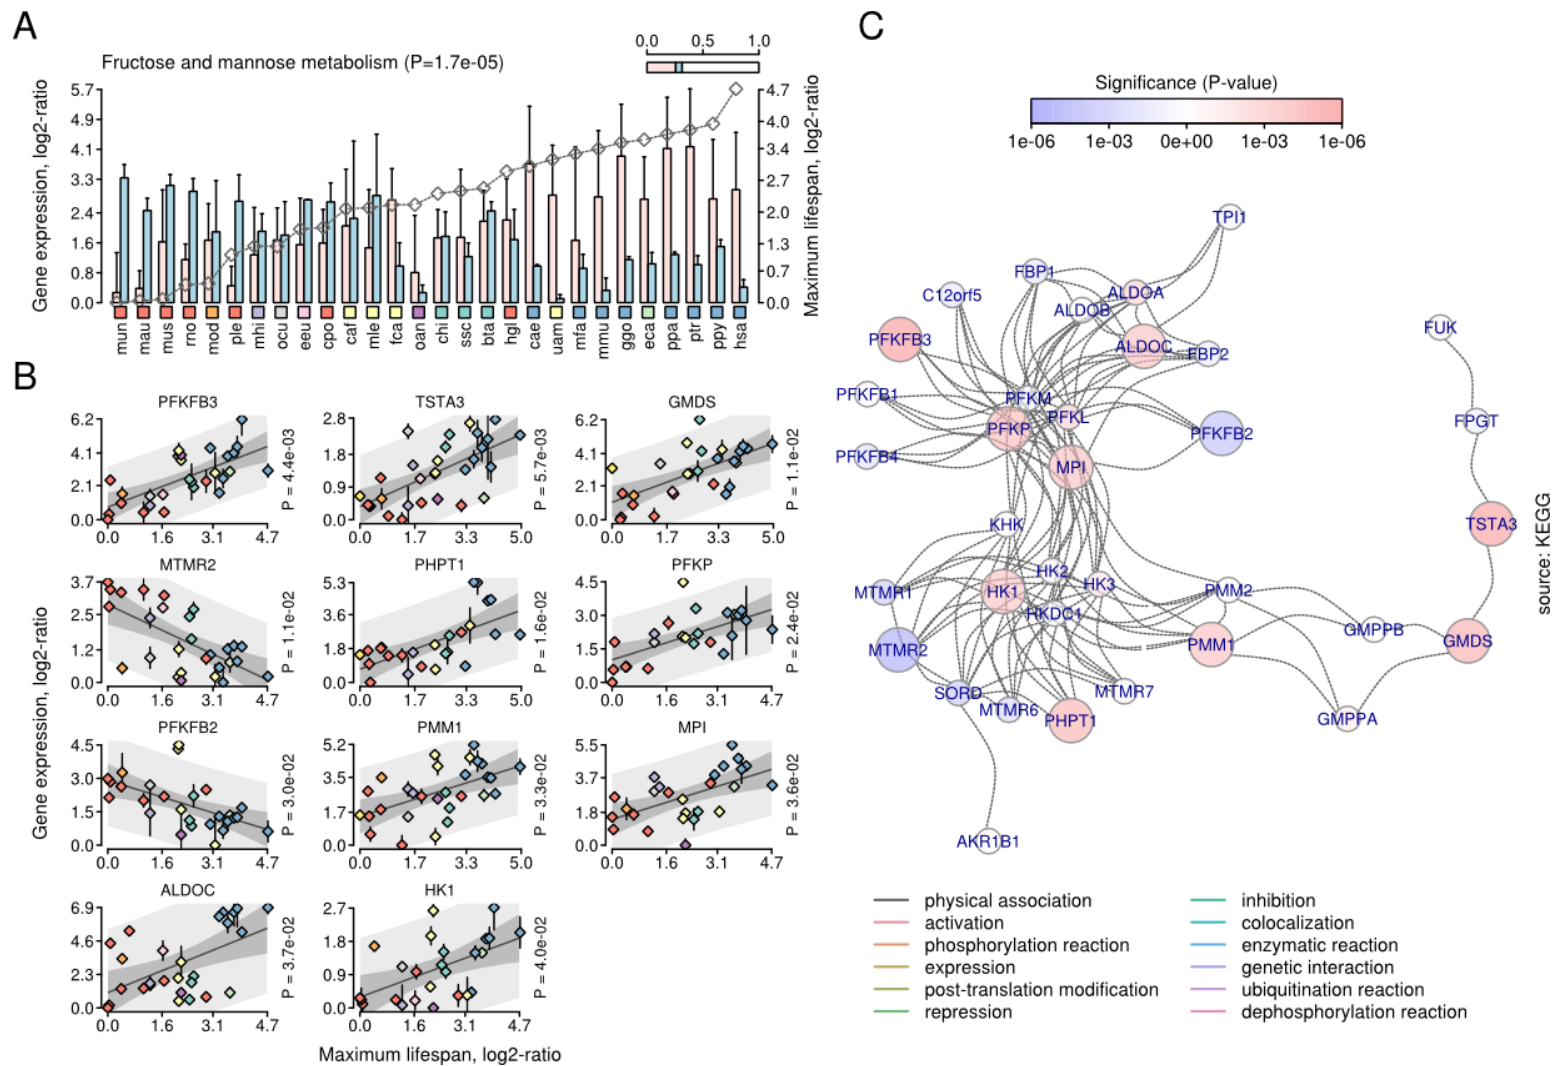

**Figure S14. Genes encoding enzymes of carbohydrate degradation pathway are differentially expressed in liver.** (A) Mean FPKM of all significant genes. Bars in pink denote upregulated genes. Blue bars correspond to downregulated genes. Error bars indicate standard deviation of the mean. Grey line is the relative value of life history variable (maximum lifespan, axis on the right). Species are shown at the bottom. Color-coded rectangles distinguish

lineages. Bar at the top right shows proportion of significant genes from all genes associated with this pathway.  $P$ -value denotes statistical enrichment (right-sided hypergeometric test). (B) Genes whose expression variation correlates with life history variation. Vertical axis is the relative FPKM log<sub>2</sub>-transformed. Horizontal axis is the relative life history variable in logarithmic space. Rhombs are the means of FPKM. Colors of rhombs distinguish lineages. Error bars show standard deviation of the mean.  $P$ -value denotes significance of the OLS model. Median grey line is best-fit OLS line. Shaded areas indicate observed and predicted upper (95%) and lower (5%) confidence intervals. (C) Functional interaction network. Color of nodes denotes significance of the OLS model. Positively correlated genes are in red. Negatively correlated genes are in blue. Color of edges denotes type of interaction (bottom).

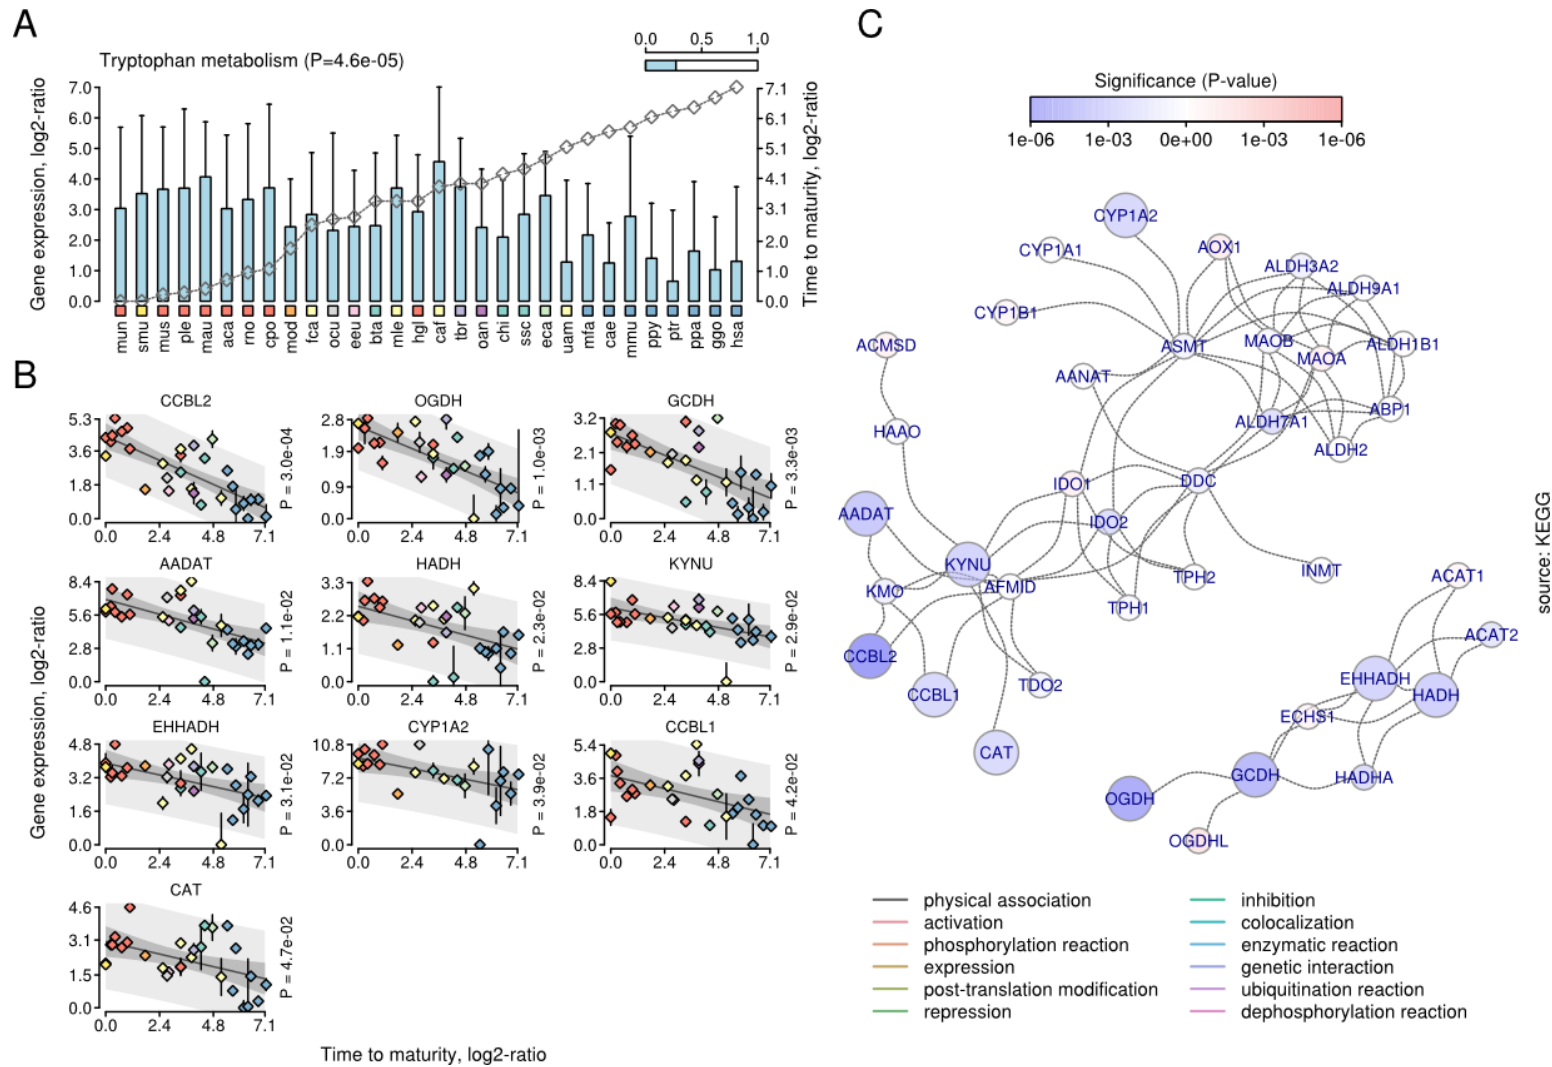

**Figure S15. Gene expression variation associated with tryptophan metabolism in liver.** (A) Mean FPKM of all significant genes. Error bars indicate standard deviation of the mean. Grey line is the relative value of life history variable (time to maturity, axis on the right). Species are shown at the bottom. Color-coded rectangles distinguish lineages. Bar at the top right shows proportion of significant genes from all genes associated with this pathway.  $P$ -

value denotes statistical enrichment (right-sided hypergeometric test). (B) Genes whose expression variation correlates with life history variation. Vertical axis is the relative FPKM log<sub>2</sub>-transformed. Horizontal axis is the relative life history variable in logarithmic space. Rhombs are the means of FPKM. Colors of rhombs distinguish lineages. Error bars show standard deviation of the mean. *P*-value denotes significance of the OLS model. Median grey line is best-fit OLS line. Shaded areas indicate observed and predicted upper (95%) and lower (5%) confidence intervals. (C) Functional interaction network. Color of nodes denotes significance of the OLS model. Positively correlated genes are in red. Negatively correlated genes are in blue. Color of edges denotes type of interaction (bottom).

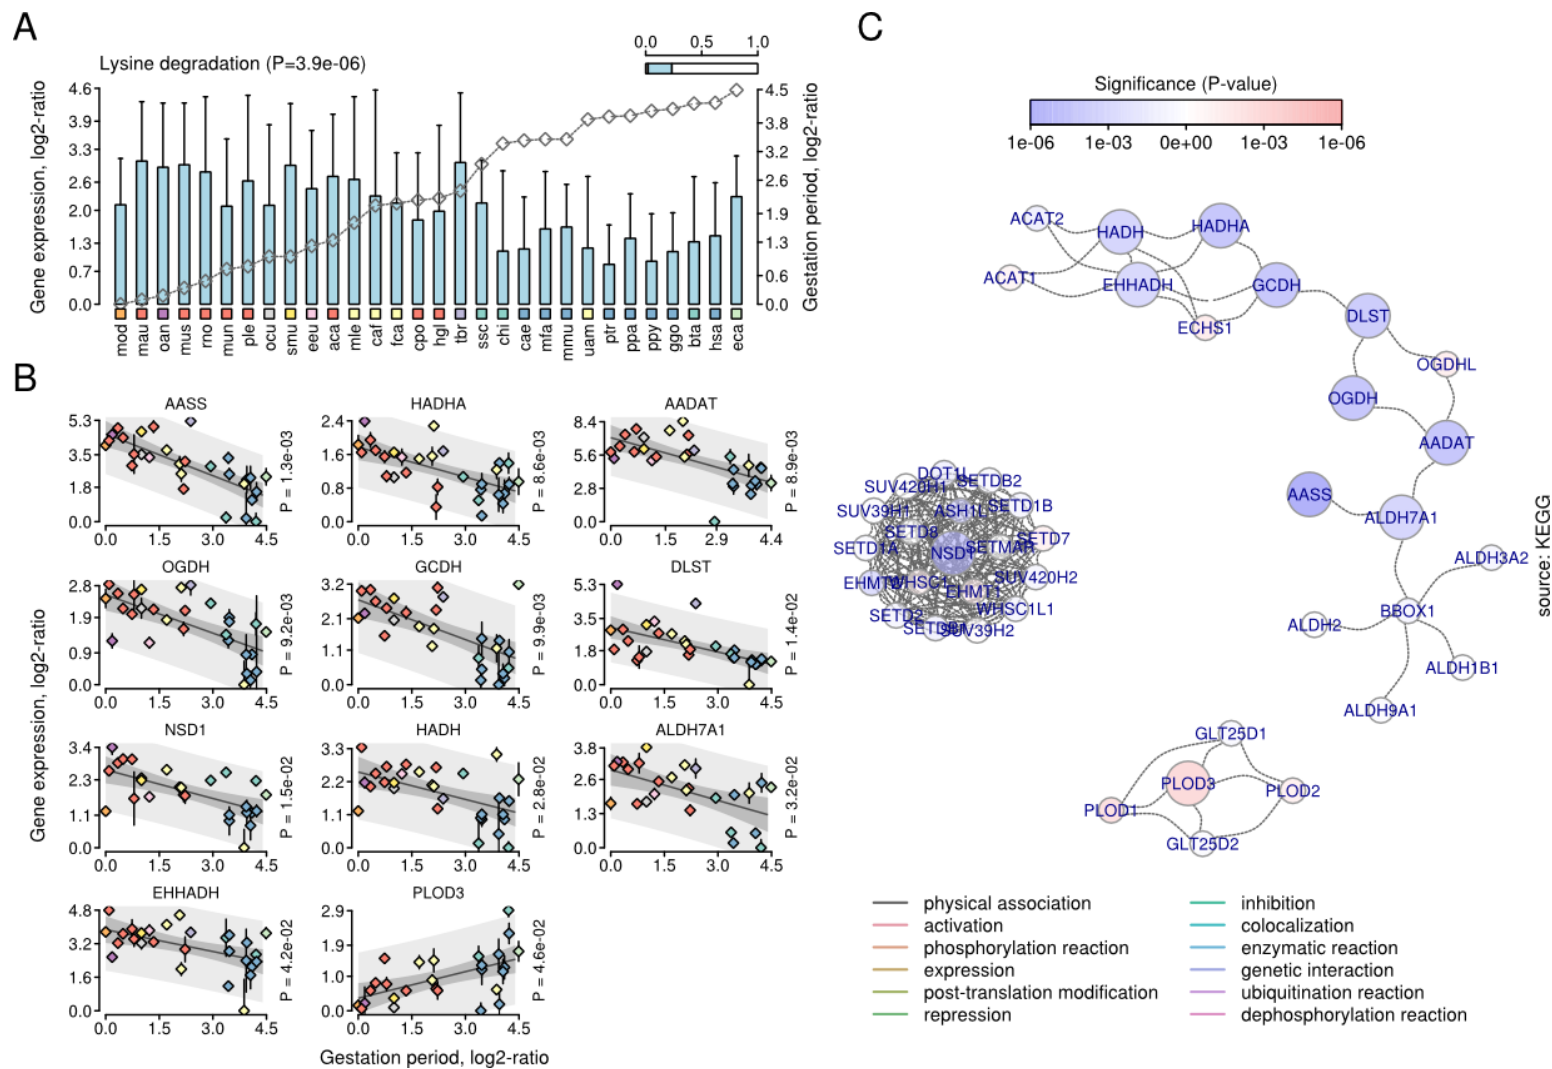

**Figure S16. Gene expression variation associated with lysine metabolism in liver.** (A) Mean FPKM of all significant genes. Error bars indicate standard deviation of the mean. Grey line is the relative value of life history variable (gestation period, axis on the right). Species are shown at the bottom. Color-coded rectangles distinguish lineages. Bar at the top right shows proportion of significant genes from all genes associated with this

pathway.  $P$ -value denotes statistical enrichment (right-sided hypergeometric test). (B) Genes whose expression variation correlates with life history variation. Vertical axis is the relative FPKM log<sub>2</sub>-transformed. Horizontal axis is the relative life history variable in logarithmic space. Rhombs are the means of FPKM. Colors of rhombs distinguish lineages. Error bars show standard deviation of the mean.  $P$ -value denotes significance of the OLS model. Median grey line is best-fit OLS line. Shaded areas indicate observed and predicted upper (95%) and lower (5%) confidence intervals. (C) Functional interaction network. Color of nodes denotes significance of the OLS model. Positively correlated genes are in red. Negatively correlated genes are in blue. Color of edges denotes type of interaction (bottom).

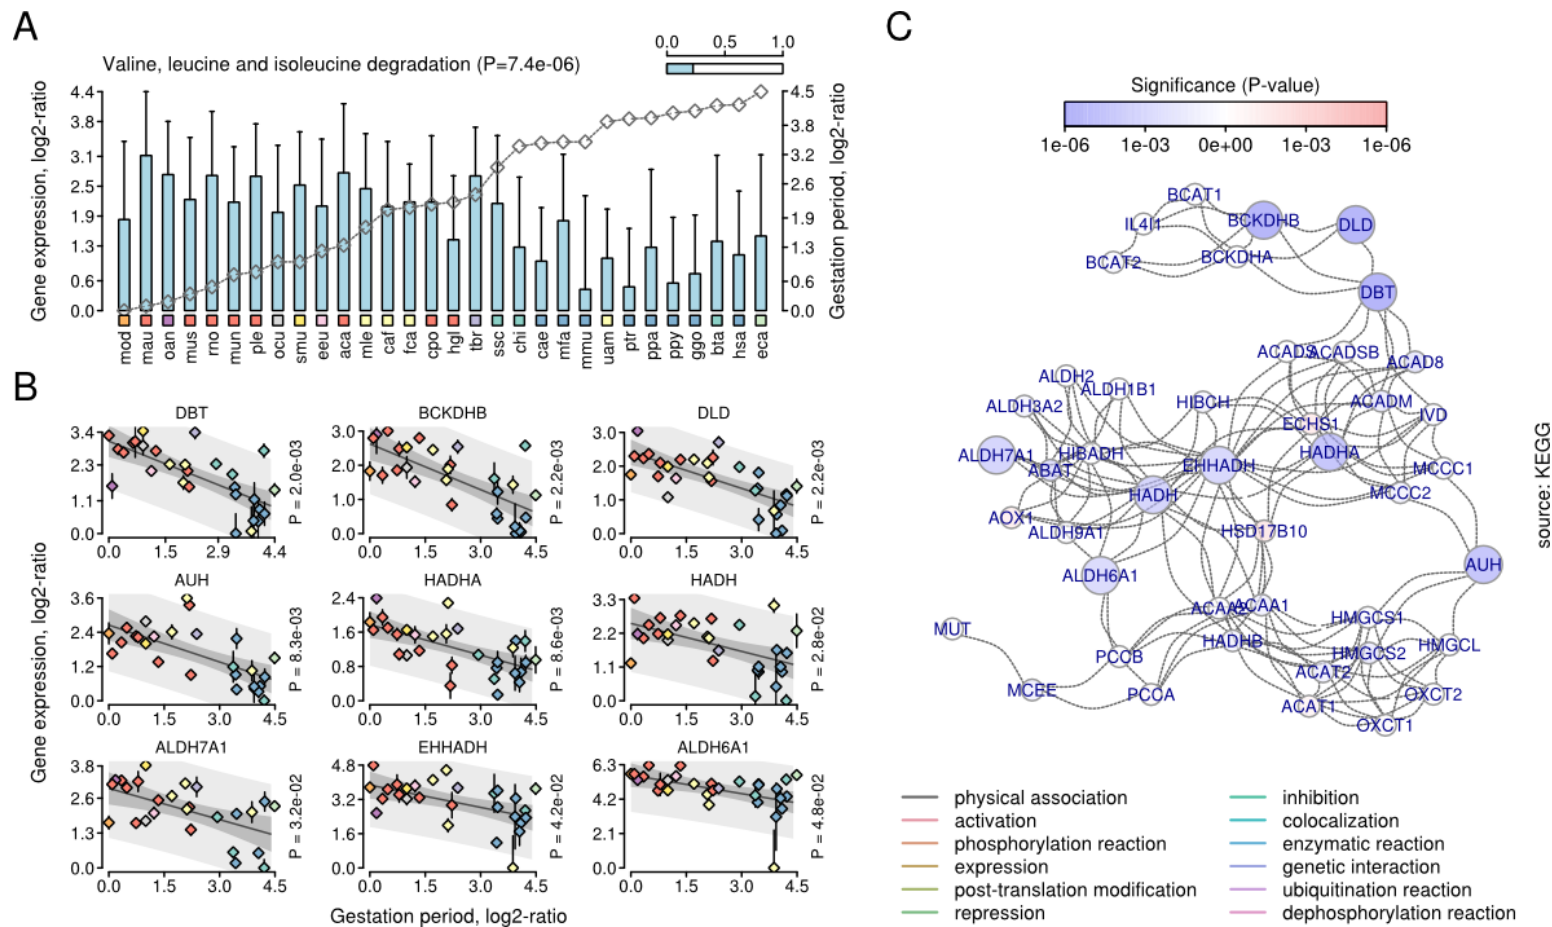

**Figure S17. Gene expression variation associated with valine metabolism in liver.** (A) Mean FPKM of all significant genes. Error bars indicate standard deviation of the mean. Grey line is the relative value of life history variable (gestation period, axis on the right). Species are shown at the bottom. Color-coded rectangles distinguish lineages. Bar at the top right shows proportion of significant genes from all genes associated with this pathway.  $P$ -value denotes statistical enrichment (right-sided hypergeometric test). (B) Genes whose expression variation correlates with life history variation. Vertical axis is the relative FPKM log<sub>2</sub>-transformed. Horizontal axis is the relative life history variable in logarithmic space. Rhombs are the means of FPKM. Colors of rhombs distinguish lineages. Error bars show standard deviation of the mean.  $P$ -value denotes significance of the OLS model.



Median grey line is best-fit OLS line. Shaded areas indicate observed and predicted upper (95%) and lower (5%) confidence intervals. (C) Functional interaction network. Color of nodes denotes significance of the OLS model. Positively correlated genes are in red. Negatively correlated genes are in blue. Color of edges denotes type of interaction (bottom).

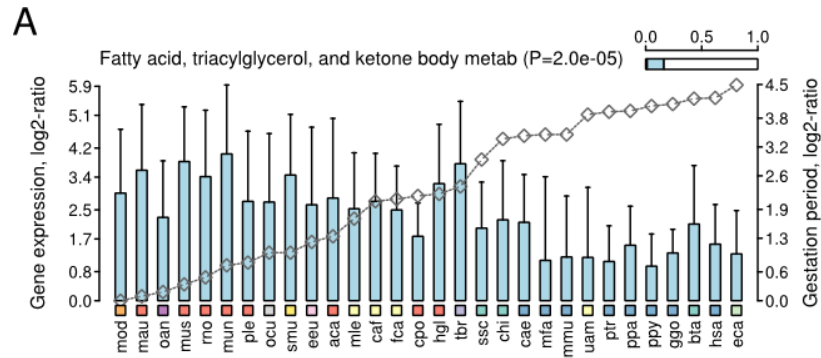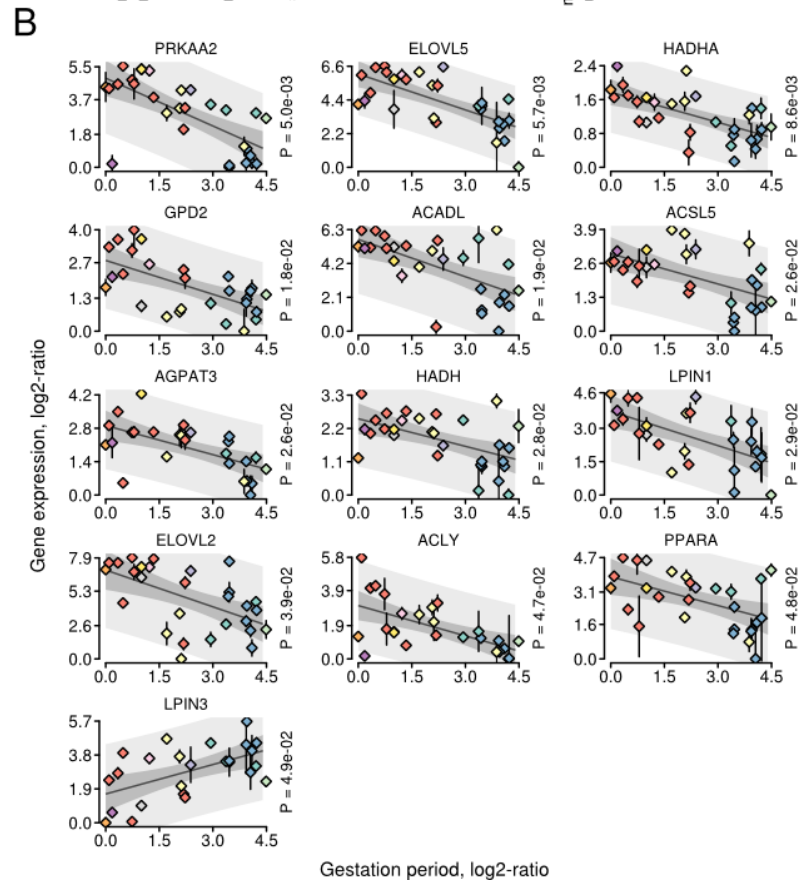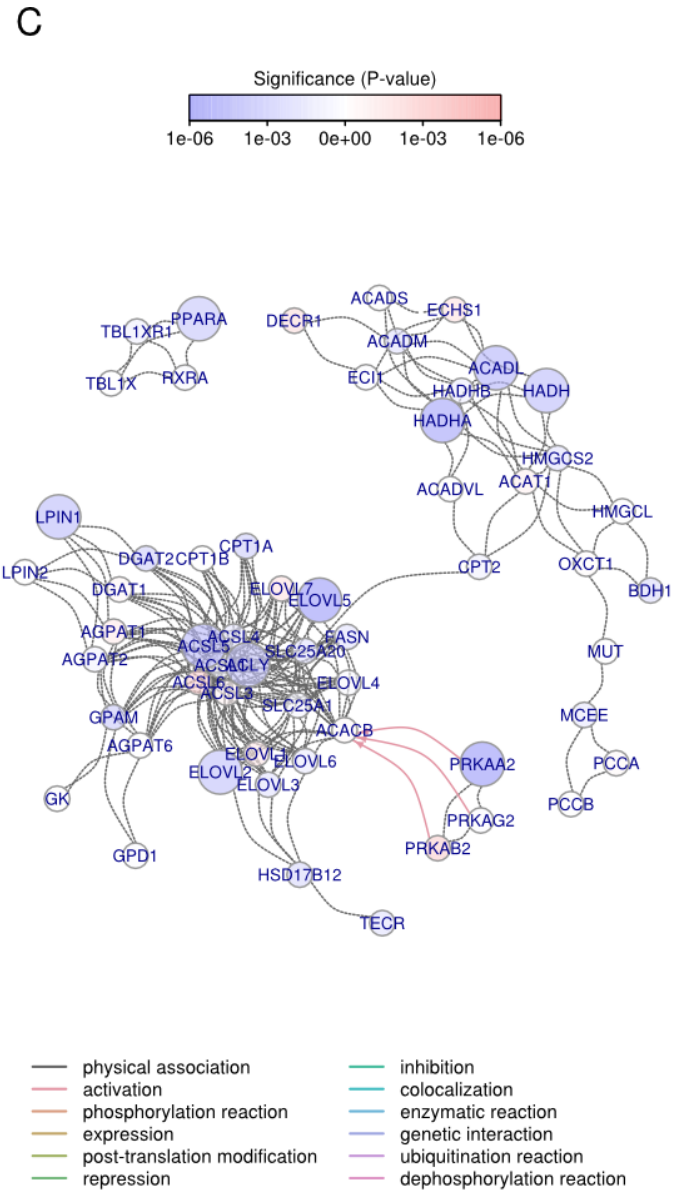

**Figure S18. Gene expression variation associated with fatty acid metabolism in liver.** (A) Mean FPKM of all significant genes. Error bars indicate standard deviation of the mean. Grey line is the relative value of life history variable (gestation period, axis on the right). Species are shown at the bottom. Color-coded rectangles distinguish lineages. Bar at the top right shows proportion of significant genes from all genes associated with this pathway. *P*-value denotes statistical enrichment (right-sided hypergeometric test). (B) Genes whose expression variation correlates with life history variation. Vertical axis is the relative FPKM log<sub>2</sub>-transformed. Horizontal axis is the relative life history variable in logarithmic space. Rhombs are the means of FPKM. Colors of rhombs distinguish lineages. Error bars show standard deviation of the mean. *P*-value denotes significance of the OLS model. Median grey line is best-fit OLS line. Shaded areas indicate observed and predicted upper (95%) and lower (5%) confidence intervals. (C) Functional interaction network. Color of nodes denotes significance of the OLS model. Positively correlated genes are in red. Negatively correlated genes are in blue. Color of edges denotes type of interaction (bottom).

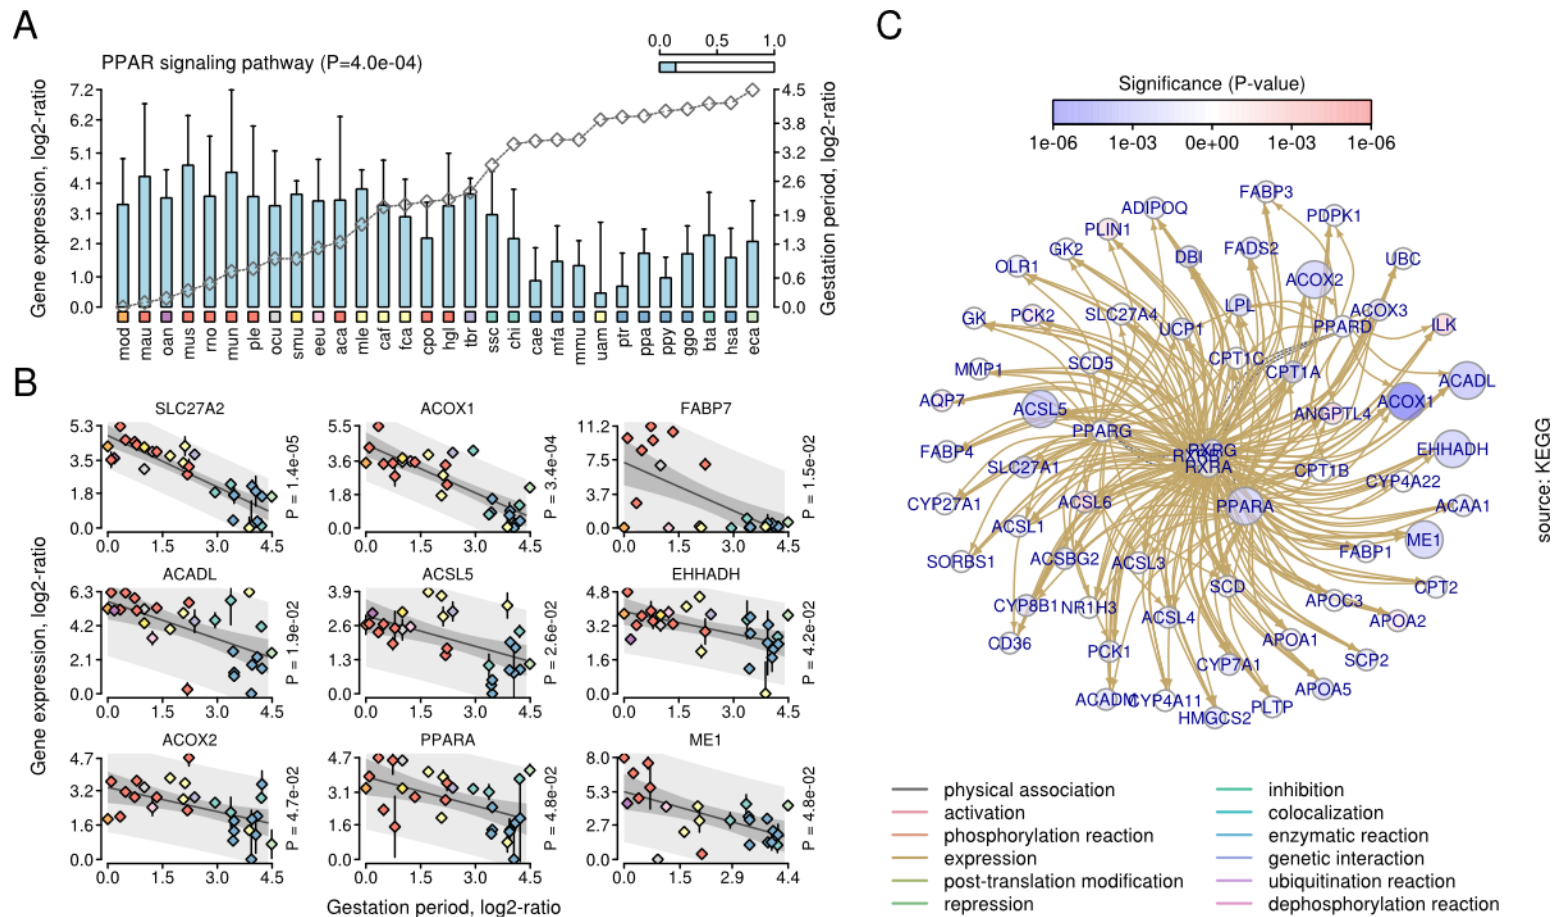

**Figure S19. Gene expression variation associated with the peroxisome proliferator pathway in liver.** (A) Mean FPKM of all significant genes. Error bars indicate standard deviation of the mean. Grey line is the relative value of life history variable (gestation period, axis on the right). Species are shown at the bottom. Color-coded rectangles distinguish lineages. Bar at the top right shows proportion of significant genes from all genes associated with this pathway.  $P$ -value denotes statistical enrichment (right-sided hypergeometric test). (B) Genes whose expression variation correlates with life history variation. Vertical axis is the relative FPKM log<sub>2</sub>-transformed. Horizontal axis is the relative life history variable in logarithmic space. Rhombs are the means of FPKM. Colors of rhombs distinguish lineages. Error bars show standard deviation of the mean.  $P$ -value denotes significance of the OLS model.

Median grey line is best-fit OLS line. Shaded areas indicate observed and predicted upper (95%) and lower (5%) confidence intervals. (C) Functional interaction network. Color of nodes denotes significance of the OLS model. Positively correlated genes are in red. Negatively correlated genes are in blue. Color of edges denotes type of interaction (bottom).

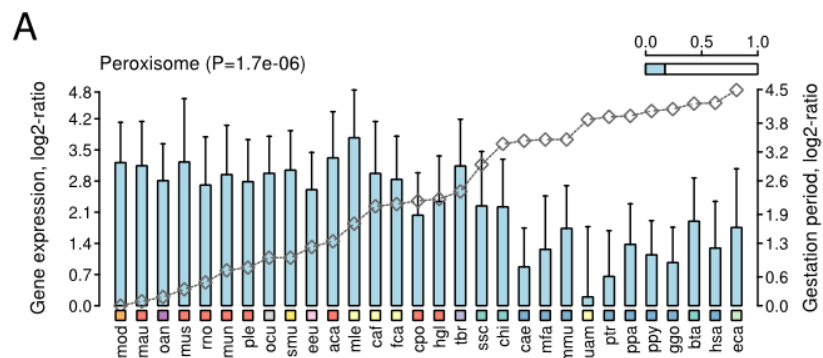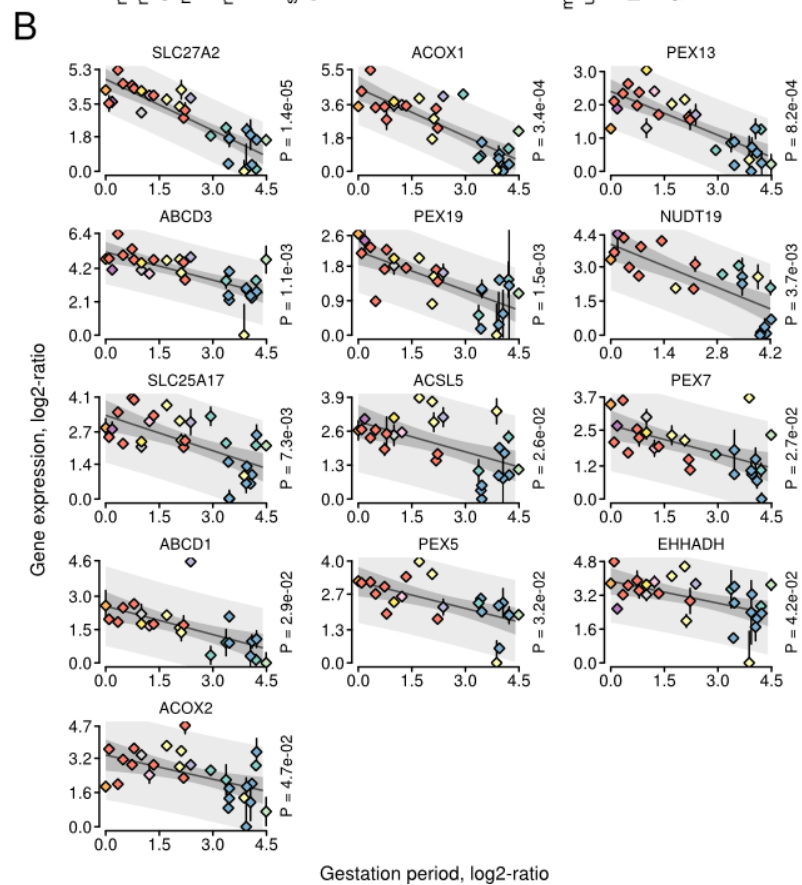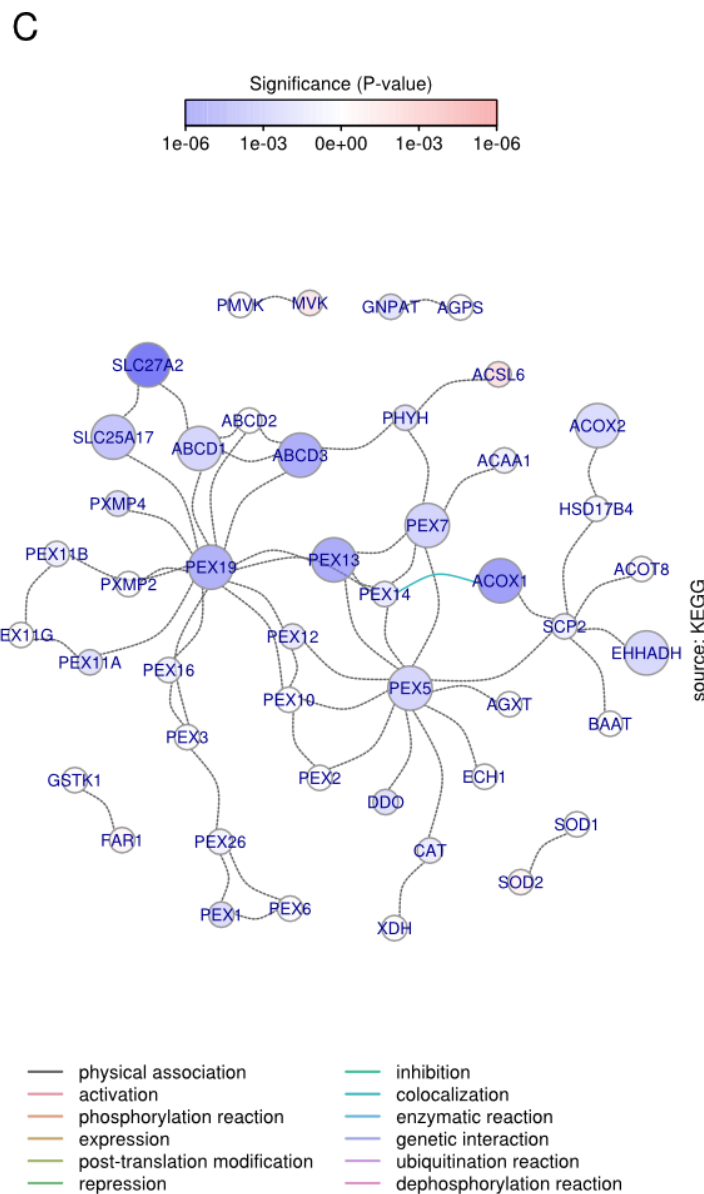

**Figure S20. Gene expression variation associated with peroxisome negatively correlates with life history variation in liver.** (A) Mean FPKM of all significant genes. Error bars indicate standard deviation of the mean. Grey line is the relative value of life history variable (gestation period, axis on the right). Species are shown at the bottom. Color-coded rectangles distinguish lineages. Bar at the top right shows proportion of significant genes from all genes associated with this pathway. *P*-value denotes statistical enrichment (right-sided hypergeometric test). (B) Genes whose expression variation correlates with life history variation. Vertical axis is the relative FPKM log<sub>2</sub>-transformed. Horizontal axis is the relative life history variable in logarithmic space. Rhombs are the means of FPKM. Colors of rhombs distinguish lineages. Error bars show standard deviation of the mean. *P*-value denotes significance of the OLS model. Median grey line is best-fit OLS line. Shaded areas indicate observed and predicted upper (95%) and lower (5%) confidence intervals. (C) Functional interaction network. Color of nodes denotes significance of the OLS model. Positively correlated genes are in red. Negatively correlated genes are in blue. Color of edges denotes type of interaction (bottom).

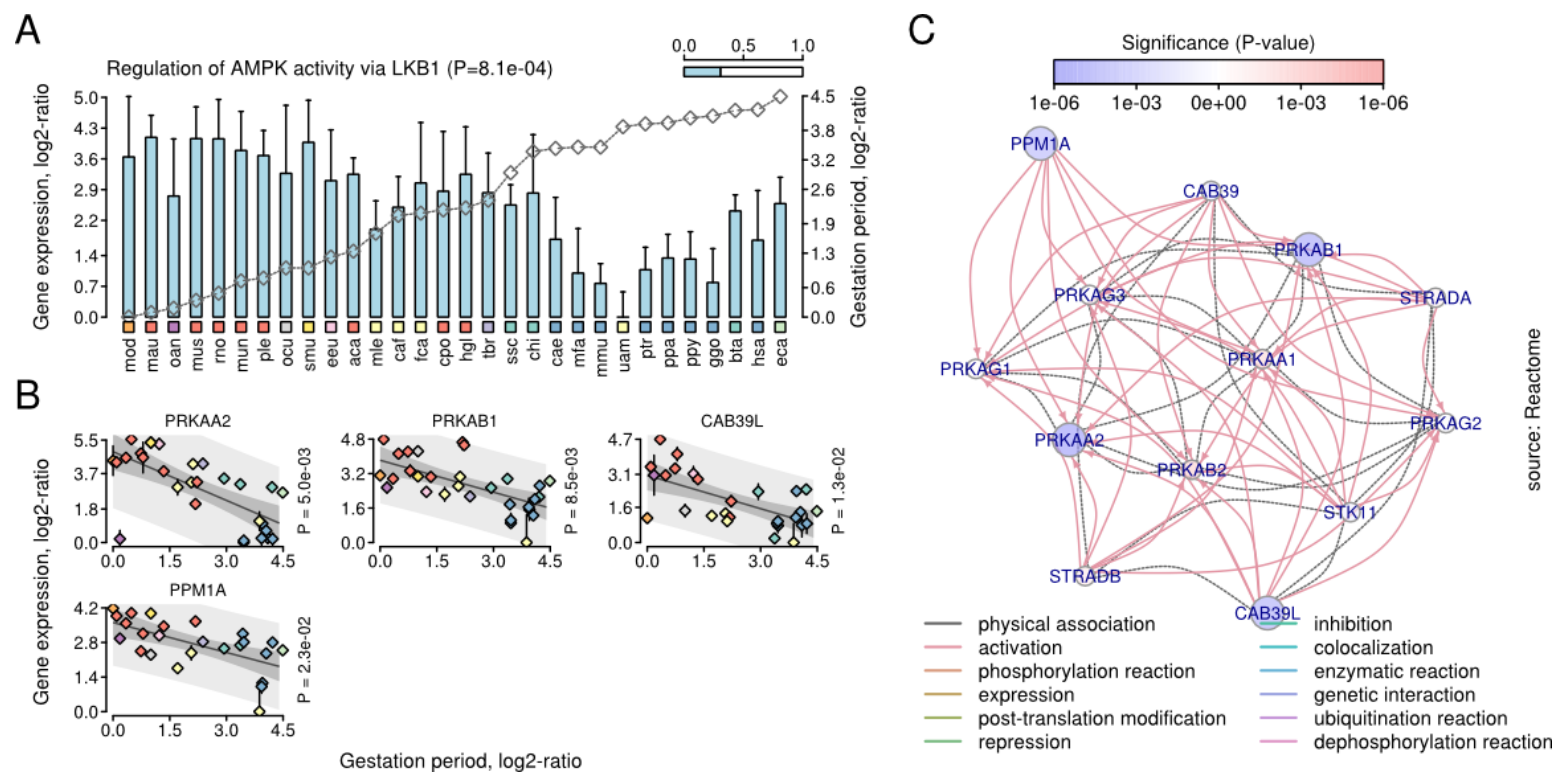

**Figure S21. Gene expression variation associated with AMPK signaling negatively correlates with life history variation in liver.** (A) Mean FPKM of all significant genes. Error bars indicate standard deviation of the mean. Grey line is the relative value of life history variable (gestation period, axis on the right). Species are shown at the bottom. Color-coded rectangles distinguish lineages. Bar at the top right shows proportion of significant genes from all genes associated with this pathway.  $P$ -value denotes statistical enrichment (right-sided hypergeometric test). (B) Genes whose expression variation correlates with life history variation. Vertical axis is the relative FPKM log<sub>2</sub>-transformed. Horizontal axis is the relative life history variable in logarithmic space. Rhombs are the means of FPKM. Colors of rhombs distinguish lineages. Error bars show standard deviation of the mean.  $P$ -value denotes significance of the OLS model. Median grey line is best-fit OLS line. Shaded areas indicate observed and predicted upper (95%) and lower (5%) confidence intervals. (C) Functional interaction network. Color of nodes denotes significance of the OLS model. Positively correlated genes are in red. Negatively correlated genes are in blue. Color of edges denotes type of interaction (bottom).



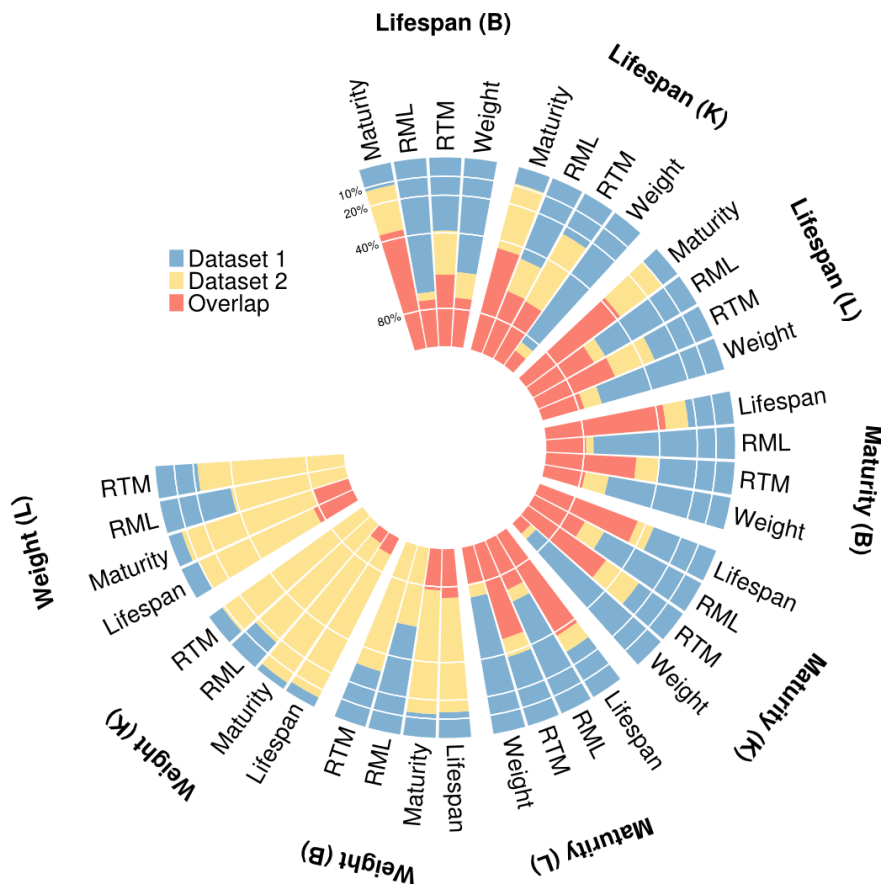

**Figure S22. Overlap of genes whose expression variation associates with life histories and residuals.** Each color-coded bar shows percentages of genes (scale at the beginning) unique for two data sets (blue, yellow) and percentage of common genes (red). RML, residual of maximum lifespan; RTM, residual of maturation time. L, liver; K, kidney; B, brain.

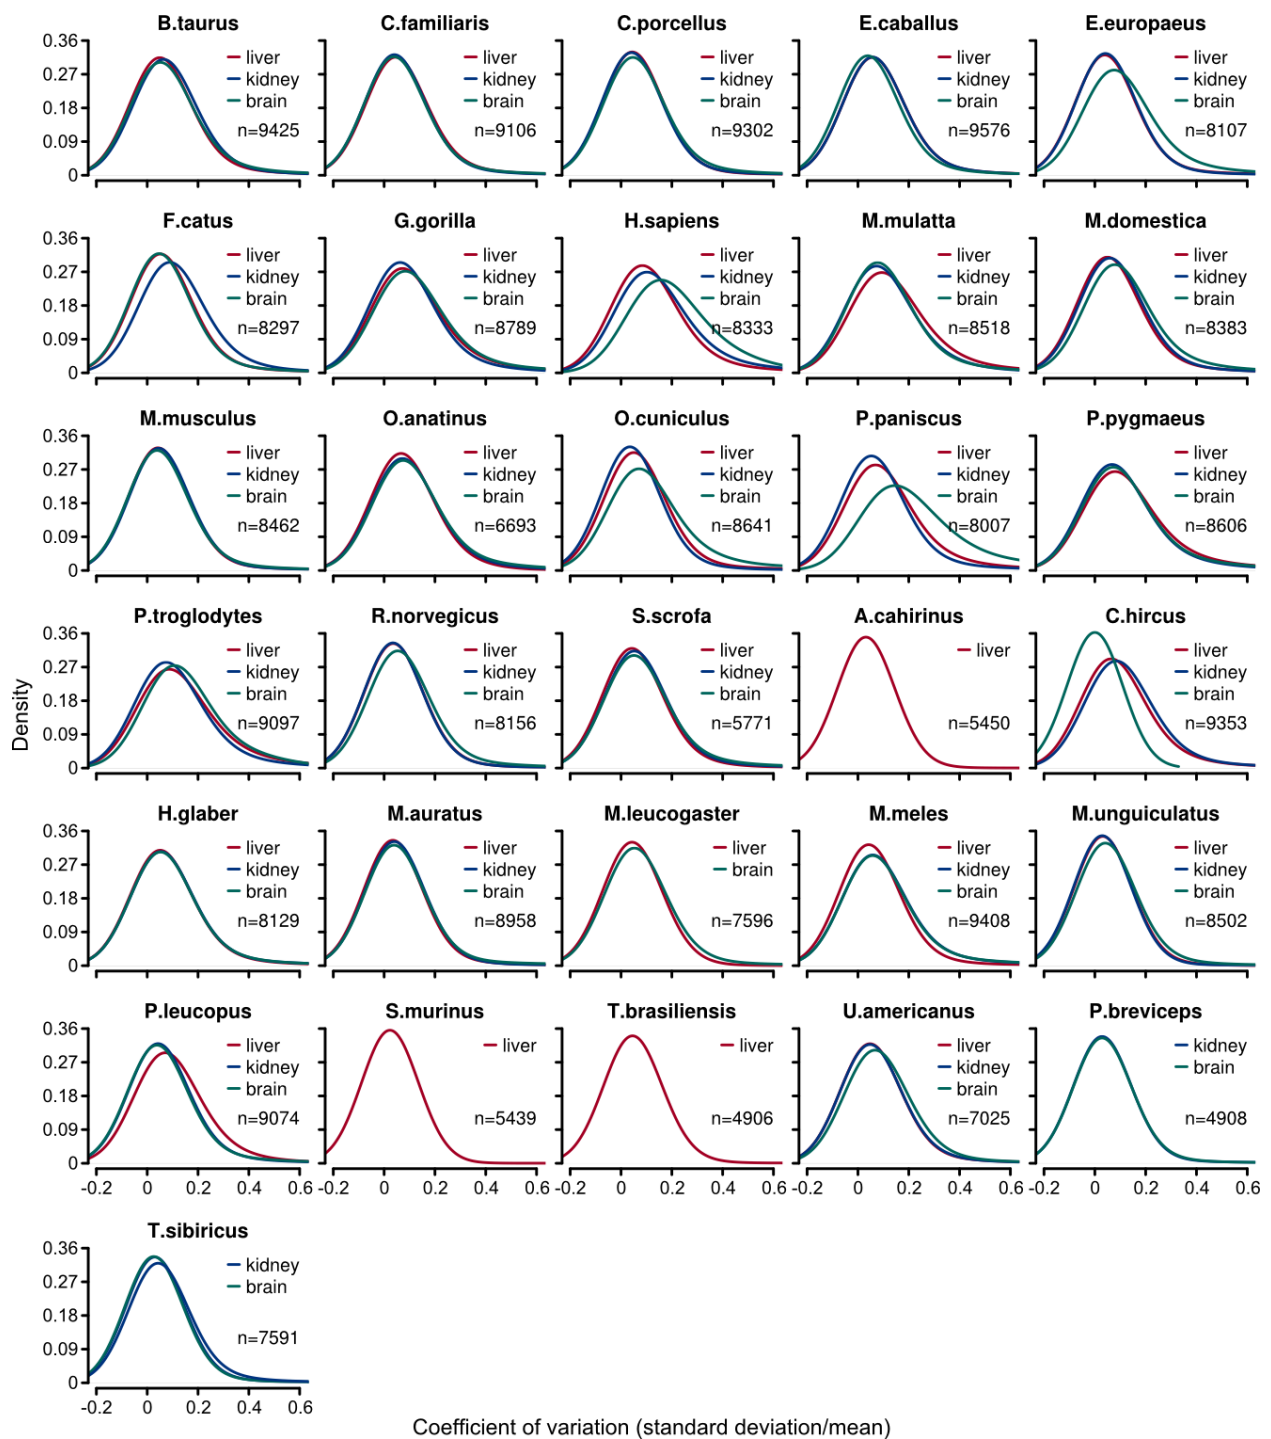

**Figure S23. Within species FPKM variation.** Each panel shows density of CV (coefficient of variation) for the liver, kidney and brain for one of the indicated species (top). *n* denotes total number of orthologs assayed in the analyses.

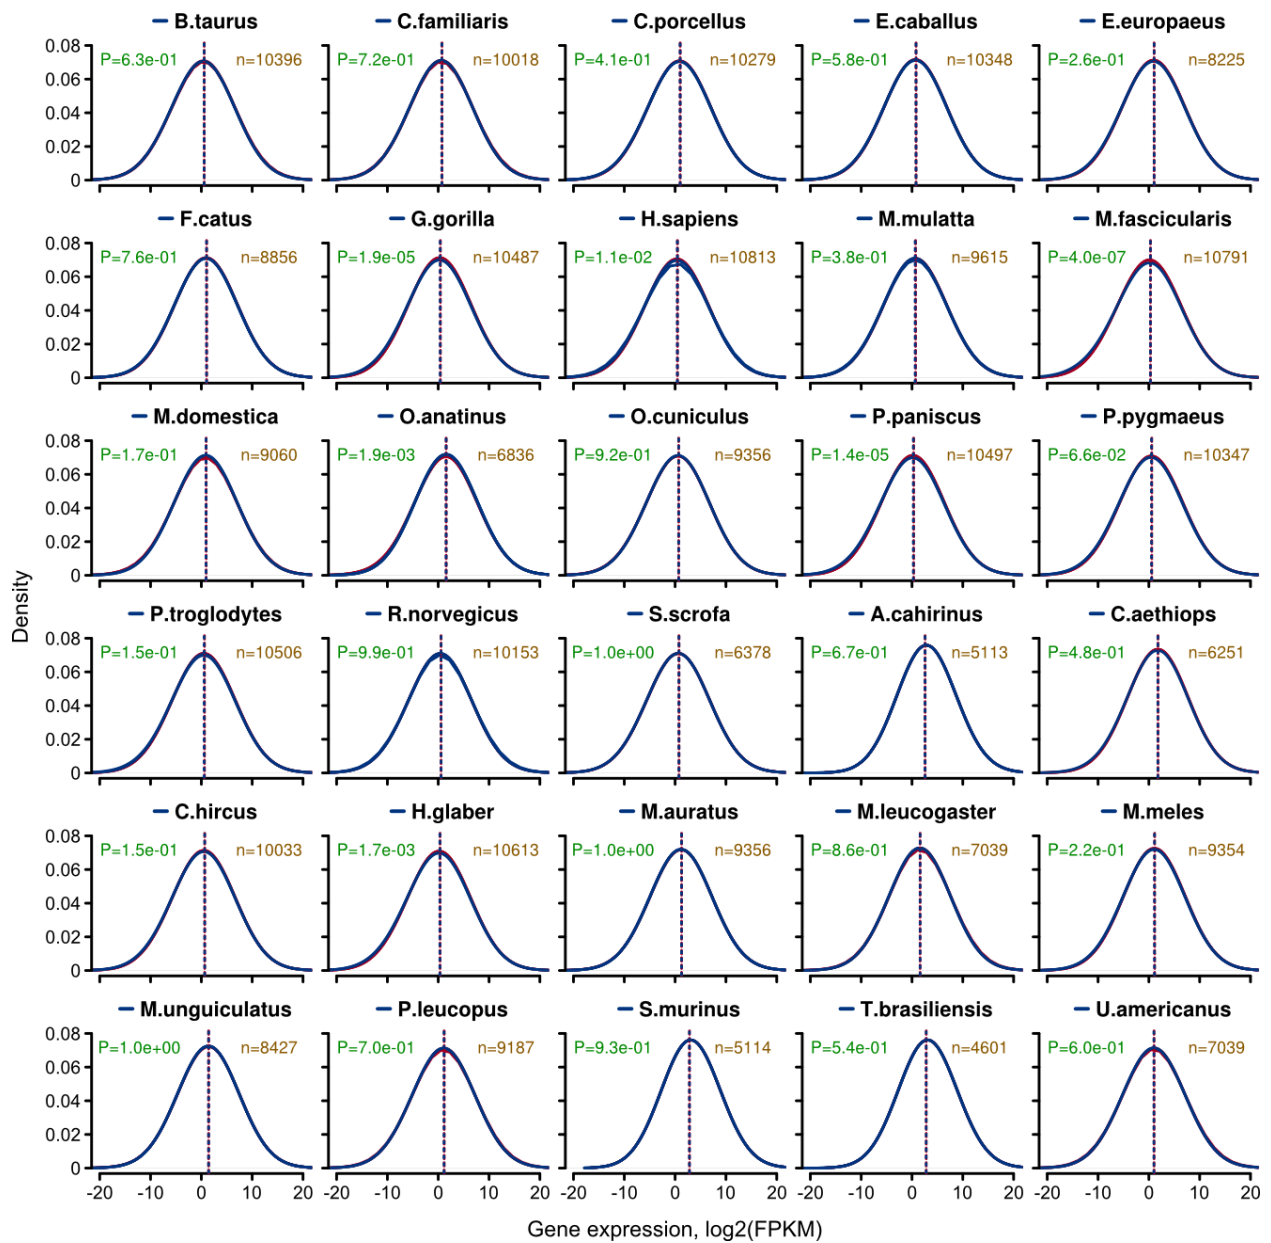

**Figure S24. Normalization of liver RNA-seq samples.** Each panel shows density of mouse FPKM (in red) and FPKM of one of the indicated species (in blue).  $n$  denotes total number of orthologous pairs. Dashed lines denote median FPKM.  $P$ -value denotes significance of a difference between distributions of mean FPKM of two species (two-sided Welch's test).

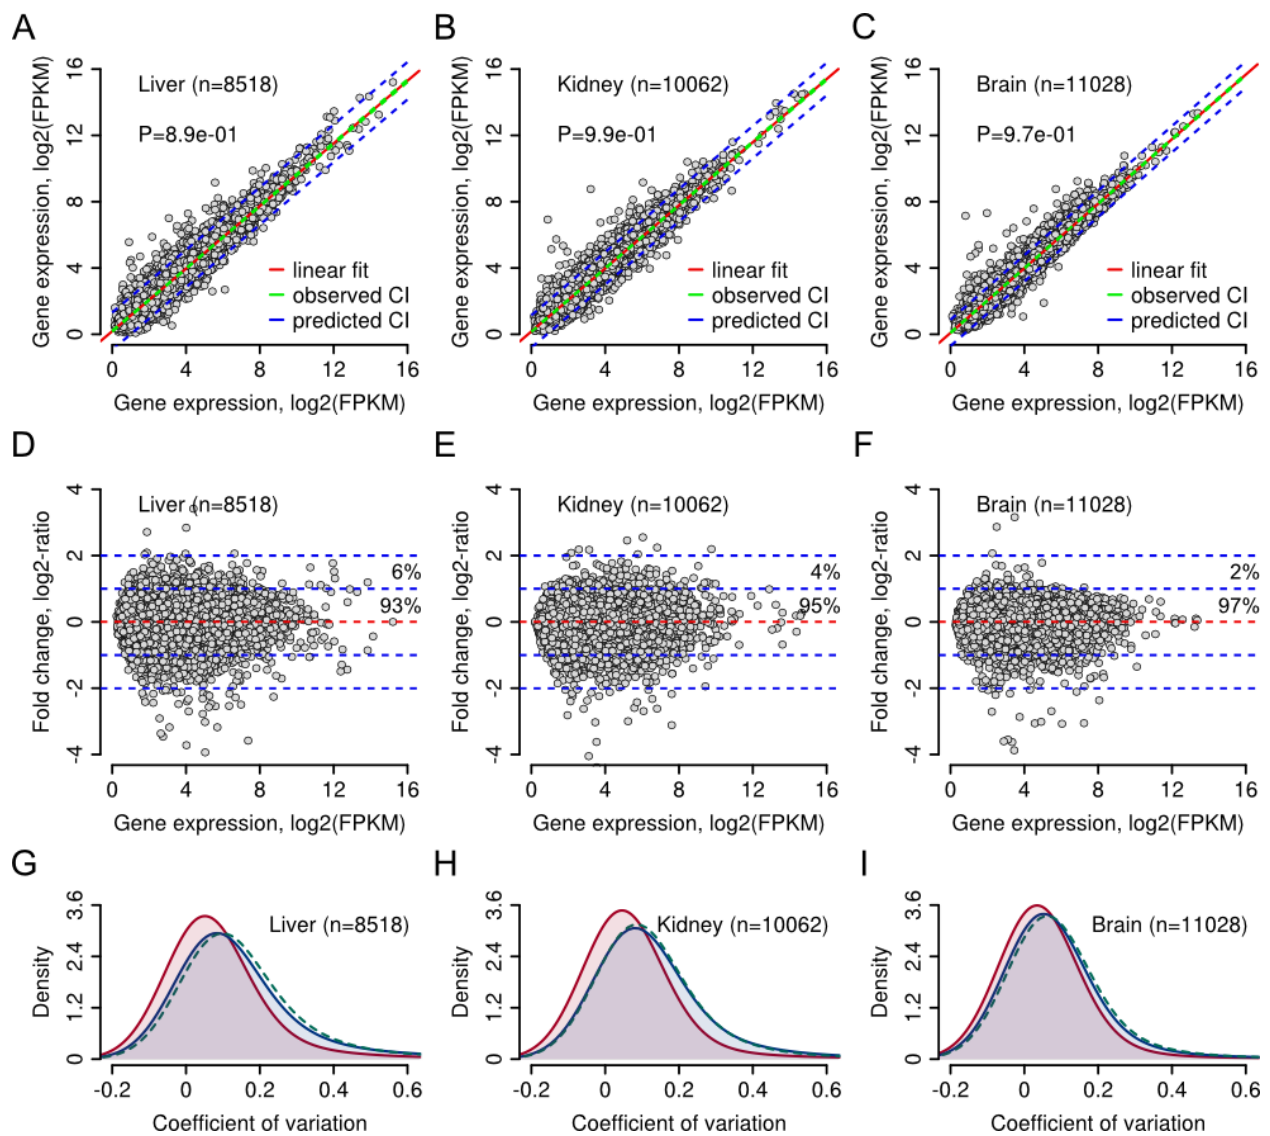

**Figure S25. Variation between in-house and database RNA-seq data.** (A), (B) and (C) Mean FPKM calculated from in-house RNA-seq libraries (vertical axis) and plotted against database RNA-seq data (horizontal axis, NCBI accession GSE30352) for liver, kidney and brain, respectively. Red line is best-fit regression line. CI, observed (green) and predicted (blue) upper (95%) and lower (5%) confidence intervals.  $P$ , K-S significance of difference ( $P$ -value) between distributions of FPKM. (D), (E) and (F) FPKM variation between in-house and database samples (fold change, vertical axis) plotted against mean FPKM for liver, kidney and brain (horizontal axis), respectively. Dashed blue lines with numbers indicate percentage of genes whose expression variation associate with specific fold change interval (e.g. expression variation of 93% of orthologs does not exceed  $\log_2\text{-ratio}$  1 in the liver). (G), (H) and (I) Each panel shows density of CV (coefficient of variation) for in-house (red) and database (blue) RNA-seq data for one of the liver, kidney and brain, respectively. Dashed green line denotes density of CV for the combined dataset.  $n$  indicates total number of orthologs plotted in the graphs.

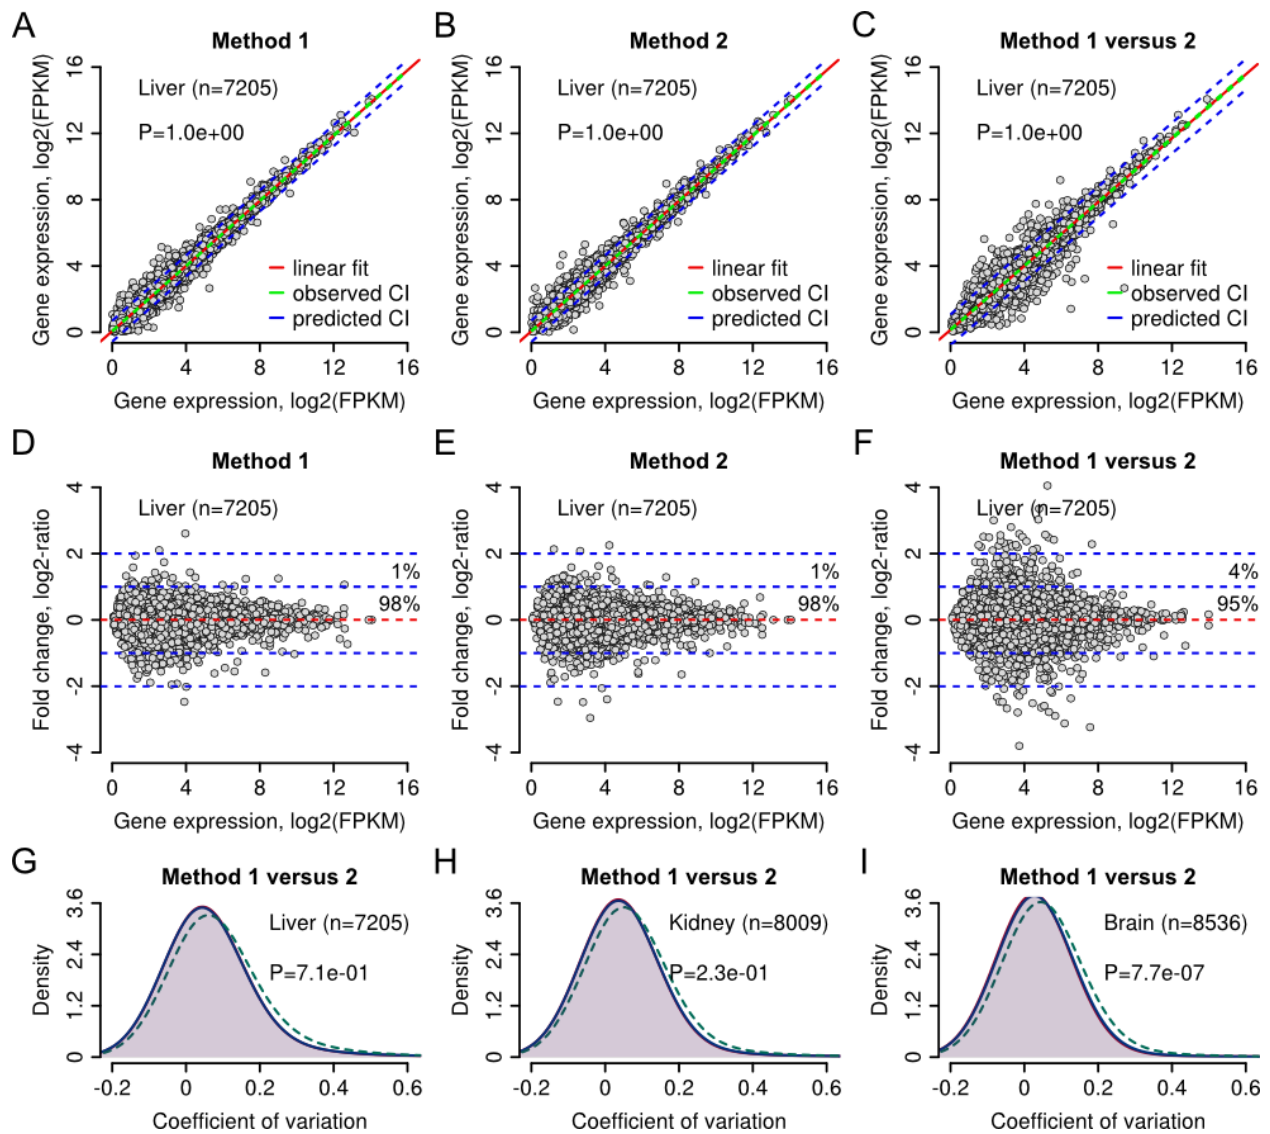

**Figure S26. Variation between FPKM produced from genomic and *de novo* contig RNA-seq read alignments.** RNA-seq reads (biological samples 1 and 2) were aligned with mouse genome (method 1) and *de novo* assembled transcriptome (method 2). (A) “Method 1” FPKM of sample 1 (vertical axis) plotted against “method 1” FPKM of sample 2 (horizontal axis) for liver. (B) “Method 2” FPKM of sample 1 (vertical axis) plotted against “method 2” FPKM of sample 2 (horizontal axis) for liver. (C) “Method 1” FPKM averaged between samples 1 and 2 (vertical axis) plotted against “method 2” mean FPKM (bottom axis) for liver. Red line is best-fit regression line. CI, observed (green) and predicted (blue) upper (95%) and lower (5%) confidence intervals. *P*, K-S significance of difference (*P*-value) between “method 1” and “method 2” distributions of FPKM. (D) Expression variation (fold change, vertical axis) between “method 1” FPKM of samples 1 and 2 plotted against mean FPKM for liver. (E) Expression variation (fold change, vertical axis) between “method 2” samples 1 and 2 plotted against mean FPKM for liver. (F) Expression variation (fold change, vertical axis) between “method 1” mean FPKM and “method 2” mean FPKM plotted against mean FPKM of all samples (bottom axis) for liver. Dashed blue lines with numbers indicate percentage of genes whose expression variation associate with specific fold change interval (e.g.

expression variation of 95% of orthologs does not exceed log<sub>2</sub>-ratio 1). (G), (H) and (I) Panels show density of CV (coefficient of variation) for “method 1” (red) and “method 2” (blue) FPKM for one of the liver, kidney or brain, respectively. Dashed green line denotes density of CV for the combined dataset.  $n$  indicates total number of orthologs plotted in the graphs.  $P$ , K-S significance of difference ( $P$ -value) between “method 1” and “method 2” distributions of CV.

Table S1. Classification and sampling sources of 33 mammals.

| Class    | Order           | Family            | Genus                  | Species             | Common name                | NCBI id | Abbreviation | Number of samples |        |       | Source <sup>1</sup> |
|----------|-----------------|-------------------|------------------------|---------------------|----------------------------|---------|--------------|-------------------|--------|-------|---------------------|
|          |                 |                   |                        |                     |                            |         |              | Liver             | Kidney | Brain |                     |
| Mammalia | Euungulata      | Bovidae           | <i>Bos</i>             | <i>taurus</i>       | Domestic cattle            | 9913    | bta          | 2                 | 2      | 2     | Study               |
| Mammalia | Euungulata      | Bovidae           | <i>Capra</i>           | <i>hircus</i>       | Domestic goat              | 9925    | chi          | 2                 | 2      | 2     | Study               |
| Mammalia | Euungulata      | Suidae            | <i>Sus</i>             | <i>scrofa</i>       | Domestic boar              | 9825    | ssc          | 2                 | 2      | 2     | Study               |
| Mammalia | Carnivora       | Canidae           | <i>Canis</i>           | <i>familiaris</i>   | Domestic dog               | 9615    | caf          | 2                 | 2      | 2     | Study               |
| Mammalia | Carnivora       | Felidae           | <i>Felis</i>           | <i>catus</i>        | Domestic cat               | 9685    | fca          | 3                 | 3      | 3     | Study               |
| Mammalia | Carnivora       | Mustelidae        | <i>Meles</i>           | <i>meles</i>        | Asian badger               | 9662    | mle          | 2                 | 2      | 2     | Study               |
| Mammalia | Carnivora       | Ursidae           | <i>Ursus</i>           | <i>americanus</i>   | American black bear        | 9643    | uam          | 2                 | 2      | 2     | Study               |
| Mammalia | Chiroptera      | Vespertilionidae  | <i>Murina</i>          | <i>leucogaster</i>  | Greater tube-nosed bat     | 685731  | mhi          | 2                 | 1      | 2     | Study               |
| Mammalia | Chiroptera      | Molossidae        | <i>Tadarida</i>        | <i>brasiliensis</i> | Brazilian free-tailed bat  | 9438    | tbr          | 3                 | -      | -     | Study               |
| Mammalia | Didelphimorphia | Didelphidae       | <i>Monodelphis</i>     | <i>domestica</i>    | Short-tailed opossum       | 13616   | mod          | 2                 | 2      | 3     | GSE30352            |
| Mammalia | Diprotodontia   | Petauridae        | <i>Petaurus</i>        | <i>breviceps</i>    | Sugar glider               | 34899   | pbr          | -                 | 2      | 2     | Study               |
| Mammalia | Erinaceomorpha  | Erinaceidae       | <i>Erinaceus</i>       | <i>europaeus</i>    | Western European hedgehog  | 9365    | eeu          | 2                 | 2      | 2     | Study               |
| Mammalia | Lagomorpha      | Leporidae         | <i>Oryctolagus</i>     | <i>cuniculus</i>    | Old World rabbit           | 9986    | ocu          | 2                 | 2      | 2     | Study               |
| Mammalia | Monotremata     | Ornithorhynchidae | <i>Ornithorhynchus</i> | <i>anatinus</i>     | Duck-billed platypus       | 9258    | oan          | 4                 | 3      | 4     | GSE30352            |
| Mammalia | Euungulata      | Equidae           | <i>Equus</i>           | <i>caballus</i>     | Horse                      | 9796    | eca          | 3                 | 3      | 2     | Study               |
| Mammalia | Primates        | Cercopithecidae   | <i>Chlorocebus</i>     | <i>aethiops</i>     | Vervet                     | 9534    | cae          | 1                 | 1      | 1     | Study               |
| Mammalia | Primates        | Hominidae         | <i>Gorilla</i>         | <i>gorilla</i>      | Gorilla                    | 9593    | ggo          | 2                 | 2      | 2     | GSE30352            |
| Mammalia | Primates        | Hominidae         | <i>Homo</i>            | <i>sapiens</i>      | Human                      | 9606    | hsa          | 3                 | 3      | 5     | GSE30352            |
| Mammalia | Primates        | Cercopithecidae   | <i>Macaca</i>          | <i>fascicularis</i> | Long-tailed macaque        | 9541    | mfa          | 1                 | 1      | 1     | GSE29629            |
| Mammalia | Primates        | Cercopithecidae   | <i>Macaca</i>          | <i>mulatta</i>      | Rhesus monkey              | 9544    | mmu          | 3                 | 2      | 3     | GSE30352            |
| Mammalia | Primates        | Hominidae         | <i>Pan</i>             | <i>paniscus</i>     | Pygmy chimpanzee or bonobo | 9597    | ppa          | 2                 | 2      | 2     | GSE30352            |
| Mammalia | Primates        | Hominidae         | <i>Pongo</i>           | <i>pygmaeus</i>     | Orangutan                  | 9600    | ppy          | 2                 | 2      | 2     | GSE30352            |
| Mammalia | Primates        | Hominidae         | <i>Pan</i>             | <i>troglydytes</i>  | Chimpanzee                 | 9598    | ptr          | 2                 | 2      | 6     | GSE30352            |
| Mammalia | Rodentia        | Muridae           | <i>Acomys</i>          | <i>cahirinus</i>    | Spiny mouse                | 10068   | aca          | 3                 | -      | -     | Study               |
| Mammalia | Rodentia        | Caviidae          | <i>Cavia</i>           | <i>porcellus</i>    | Guinea pig                 | 10141   | cpo          | 3                 | 3      | 3     | Study               |
| Mammalia | Rodentia        | Bathyergidae      | <i>Heterocephalus</i>  | <i>glaber</i>       | Naked mole-rat             | 10181   | hgl          | 2                 | 2      | 2     | GSE30337            |
| Mammalia | Rodentia        | Muridae           | <i>Mesocricetus</i>    | <i>auratus</i>      | Golden hamster             | 10036   | mau          | 3                 | 3      | 3     | Study               |
| Mammalia | Rodentia        | Muridae           | <i>Meriones</i>        | <i>unguiculatus</i> | Mongolian gerbil           | 10047   | mun          | 3                 | 3      | 3     | Study               |
| Mammalia | Rodentia        | Muridae           | <i>Mus</i>             | <i>musculus</i>     | House mouse                | 10090   | mus          | 3                 | 3      | 3     | Study               |
| Mammalia | Rodentia        | Muridae           | <i>Peromyscus</i>      | <i>leucopus</i>     | White-footed mouse         | 10041   | ple          | 2                 | 2      | 2     | Study               |
| Mammalia | Rodentia        | Muridae           | <i>Rattus</i>          | <i>norvegicus</i>   | Norway rat                 | 10116   | rno          | 3                 | 3      | 3     | Study               |
| Mammalia | Rodentia        | Sciuridae         | <i>Tamias</i>          | <i>sibiricus</i>    | Siberian chipmunk          | 64680   | tsi          | -                 | 2      | 2     | Study               |
| Mammalia | Soricomorpha    | Soricidae         | <i>Suncus</i>          | <i>murinus</i>      | House shrew                | 9378    | smu          | 3                 | -      | -     | Study               |

<sup>1</sup> RNA-seq libraries for Primates, Monotremata, and Didelphimorphia species were downloaded from Gene Expression Omnibus database ([www.ncbi.nlm.nih.gov/geo](http://www.ncbi.nlm.nih.gov/geo)).

Table S3. Statistics on *de novo* assembled RNA contigs for 12 mammals.

| Species                      | Abbreviation | N25  | N50  | N75 | Q25  | Q50   | Q75    | Shortest | Mean | Median | Longest | N_Contigs | RNA-seq reads        |
|------------------------------|--------------|------|------|-----|------|-------|--------|----------|------|--------|---------|-----------|----------------------|
| <i>Acomys cahirinus</i>      | aca          | 2778 | 1508 | 631 | 1573 | 4625  | 10938  | 200      | 860  | 459    | 14899   | 28805     | Liver                |
| <i>Chlorocebus aethiops</i>  | cae          | 2529 | 1250 | 490 | 3094 | 9727  | 24956  | 200      | 740  | 391    | 15653   | 62901     | Liver                |
| <i>Mesocricetus auratus</i>  | mau          | 3494 | 1201 | 414 | 7440 | 27588 | 92210  | 200      | 716  | 362    | 23906   | 227771    | Liver, kidney, brain |
| <i>Murina leucogaster</i>    | mhi          | 2584 | 1179 | 438 | 4242 | 13936 | 38339  | 200      | 698  | 360    | 17278   | 96004     | Liver, kidney, brain |
| <i>Meles meles</i>           | mle          | 3416 | 1361 | 467 | 6279 | 21784 | 66560  | 200      | 773  | 386    | 24100   | 170878    | Liver, kidney, brain |
| <i>Meriones unguiculatus</i> | mun          | 3828 | 1829 | 554 | 3837 | 12128 | 34251  | 200      | 839  | 364    | 22871   | 103771    | Liver, kidney, brain |
| <i>Petaurus breviceps</i>    | pbr          | 2456 | 1094 | 421 | 5747 | 19323 | 53416  | 200      | 675  | 357    | 20324   | 129937    | Kidney, brain        |
| <i>Peromyscus leucopus</i>   | ple          | 2690 | 813  | 371 | 9466 | 39410 | 123199 | 200      | 626  | 351    | 22839   | 271762    | Liver, kidney, brain |
| <i>Suncus murinus</i>        | smu          | 2872 | 1542 | 645 | 1486 | 4510  | 10760  | 200      | 871  | 458    | 15776   | 28697     | Liver                |
| <i>Tadarida brasiliensis</i> | tbr          | 2447 | 1214 | 497 | 1907 | 5979  | 15079  | 200      | 737  | 396    | 18342   | 37603     | Liver                |
| <i>Tamias sibiricus</i>      | tsi          | 2615 | 1198 | 445 | 5363 | 17685 | 48573  | 200      | 706  | 364    | 18936   | 122148    | Kidney, brain        |
| <i>Ursus americanus</i>      | uam          | 3017 | 1600 | 595 | 4283 | 13013 | 32373  | 200      | 381  | 381    | 18850   | 93108     | Liver, kidney, brain |

Note 1. N25 reports the unigene length at which 25% of the bases of the assembly were counted. Q25 reports number of contigs with sizes exceeding N25.

Note 2. N50 reports the unigene length at which 50% of the bases of the assembly were counted. Q50 reports number of contigs with sizes exceeding N50.

Note 3. N75 reports the unigene length at which 75% of the bases of the assembly were counted. Q75 reports number of contigs with sizes exceeding N75.



Table S4. Characteristics of *ab initio* predicted coding sequences and peptides for 12 mammals.

| Species                      | Abbreviation | Predicted CDS <sup>1</sup> | Complete CDS <sup>2</sup> | % complete from total | Predicted peptide size (amino acids) |      |        |         |
|------------------------------|--------------|----------------------------|---------------------------|-----------------------|--------------------------------------|------|--------|---------|
|                              |              |                            |                           |                       | Shortest                             | Mean | Median | Longest |
| <i>Acomys cahirinus</i>      | aca          | 8577                       | 5317                      | 62                    | 66                                   | 392  | 306    | 4545    |
| <i>Chlorocebus aethiops</i>  | cae          | 12614                      | 6845                      | 54                    | 66                                   | 390  | 299    | 4595    |
| <i>Mesocricetus auratus</i>  | mau          | 16326                      | 12534                     | 77                    | 66                                   | 515  | 381    | 7331    |
| <i>Murina leucogaster</i>    | mhi          | 14981                      | 8065                      | 54                    | 66                                   | 402  | 303    | 5225    |
| <i>Meles meles</i>           | mle          | 16938                      | 12087                     | 71                    | 66                                   | 481  | 360    | 7312    |
| <i>Meriones unguiculatus</i> | mun          | 14380                      | 10329                     | 72                    | 66                                   | 498  | 370    | 7289    |
| <i>Petaurus breviceps</i>    | pbr          | 20343                      | 11101                     | 55                    | 66                                   | 400  | 304    | 6415    |
| <i>Peromyscus leucopus</i>   | ple          | 17127                      | 12150                     | 71                    | 66                                   | 487  | 363    | 7315    |
| <i>Suncus murinus</i>        | smu          | 8761                       | 5039                      | 58                    | 66                                   | 404  | 305    | 4837    |
| <i>Tadarida brasiliensis</i> | tbr          | 8657                       | 4701                      | 54                    | 66                                   | 371  | 288    | 4545    |
| <i>Tamias sibiricus</i>      | tsi          | 20345                      | 11690                     | 57                    | 66                                   | 411  | 312    | 5974    |
| <i>Ursus americanus</i>      | uam          | 14415                      | 9304                      | 65                    | 66                                   | 408  | 311    | 5362    |

<sup>1</sup> Number of coding sequences predicted by Augustus software.

<sup>2</sup> Number of coding sequences with translation start and stop signals.

Table S5. Numbers of orthologs in COG.

| Species               | 33-32<br>(1310) <sup>1</sup> | 31-30<br>(2276) | 29-28<br>(2379) | 27-26<br>(1935) | 25-24<br>(1754) | 23-22<br>(1588) | 21-20<br>(1837) | 19-18<br>(1342) | 17-16<br>(853) | 15-14<br>(555) | 13-12<br>(454) | 11-10<br>(469) | 9-8<br>(637) | 7-6<br>(1042) | Total <sup>3</sup> |
|-----------------------|------------------------------|-----------------|-----------------|-----------------|-----------------|-----------------|-----------------|-----------------|----------------|----------------|----------------|----------------|--------------|---------------|--------------------|
| <i>B.taurus</i>       | 1301/99.3 <sup>2</sup>       | 2214/97.3       | 2289/96.2       | 1833/94.7       | 1634/93.2       | 1468/92.4       | 1743/94.9       | 1230/91.7       | 732/85.8       | 443/79.8       | 355/78.2       | 313/66.7       | 312/49.0     | 363/34.8      | 16230              |
| <i>C.hircus</i>       | 1305/99.6                    | 2190/96.2       | 2255/94.8       | 1766/91.3       | 1590/90.6       | 1386/87.3       | 1647/89.7       | 1081/80.6       | 597/70.0       | 299/53.9       | 151/33.3       | 100/21.3       | 47/7.4       | 17/1.6        | 14431              |
| <i>S.scrofa</i>       | 1201/91.7                    | 1838/80.8       | 1853/77.9       | 1431/74.0       | 1299/74.1       | 1169/73.6       | 1430/77.8       | 913/68.0        | 573/67.2       | 361/65.0       | 304/67.0       | 231/49.3       | 267/41.9     | 321/30.8      | 13191              |
| <i>C.familiaris</i>   | 1305/99.6                    | 2199/96.6       | 2238/94.1       | 1784/92.2       | 1595/90.9       | 1425/89.7       | 1692/92.1       | 1146/85.4       | 662/77.6       | 414/74.6       | 331/72.9       | 304/64.8       | 278/43.6     | 397/38.1      | 15770              |
| <i>F.catus</i>        | 1254/95.7                    | 2013/88.4       | 1991/83.7       | 1553/80.3       | 1352/77.1       | 1223/77.0       | 1452/79.0       | 917/68.3        | 494/57.9       | 277/49.9       | 184/40.5       | 167/35.6       | 246/38.6     | 222/21.3      | 13345              |
| <i>M.meles</i>        | 1303/99.5                    | 2253/99.0       | 2306/96.9       | 1807/93.4       | 1484/84.6       | 1100/69.3       | 612/33.3        | 302/22.5        | 132/15.5       | 61/11.0        | 42/9.3         | 23/4.9         | 8/1/2003     | 2/0.2         | 11435              |
| <i>U.americanus</i>   | 1298/99.1                    | 2149/94.4       | 2009/84.4       | 1275/65.9       | 802/45.7        | 481/30.3        | 261/14.2        | 141/10.5        | 73/8.6         | 28/5.0         | 26/5.7         | 9/1.9          | 6/0.9        | 5/0.5         | 8563               |
| <i>M.leucogaster</i>  | 1295/98.9                    | 2144/94.2       | 2016/84.7       | 1348/69.7       | 800/45.6        | 408/25.7        | 186/10.1        | 95/7.1          | 52/6.1         | 14/2.5         | 8/1.8          | 9/1.9          | 3/0.5        | 0/0.0         | 8378               |
| <i>T.brasiliensis</i> | 1235/94.3                    | 1613/70.9       | 1002/42.1       | 491/25.4        | 255/14.5        | 163/10.3        | 74/4.0          | 40/3.0          | 21/2.5         | 11/2.0         | 6/1.3          | 5/1.1          | 2/0.3        | 0/0.0         | 4918               |
| <i>M.domestica</i>    | 1267/96.7                    | 2080/91.4       | 2109/88.7       | 1675/86.6       | 1513/86.3       | 1333/83.9       | 1559/84.9       | 977/72.8        | 517/60.6       | 305/55.0       | 229/50.4       | 172/36.7       | 165/25.9     | 189/18.1      | 14090              |
| <i>P.breviceps</i>    | 1293/98.7                    | 2123/93.3       | 1986/83.5       | 1180/61.0       | 678/38.7        | 385/24.2        | 187/10.2        | 103/7.7         | 50/5.9         | 26/4.7         | 8/1.8          | 6/1.3          | 3/0.5        | 1/0.1         | 8029               |
| <i>E.europaeus</i>    | 1258/96.0                    | 1865/81.9       | 1851/77.8       | 1382/71.4       | 1258/71.7       | 1106/69.6       | 1336/72.7       | 795/59.2        | 407/47.7       | 223/40.2       | 154/33.9       | 150/32.0       | 184/28.9     | 183/17.6      | 12152              |
| <i>O.cuniculus</i>    | 1280/97.7                    | 2073/91.1       | 2075/87.2       | 1644/85.0       | 1489/84.9       | 1368/86.1       | 1598/87.0       | 1062/79.1       | 626/73.4       | 367/66.1       | 253/55.7       | 211/45.0       | 255/40.0     | 286/27.4      | 14587              |
| <i>O.anatinus</i>     | 1183/90.3                    | 1767/77.6       | 1702/71.5       | 1381/71.4       | 1238/70.6       | 1045/65.8       | 1236/67.3       | 622/46.3        | 348/40.8       | 196/35.3       | 146/32.2       | 116/24.7       | 126/19.8     | 129/12.4      | 11235              |
| <i>E.caballus</i>     | 1309/99.9                    | 2236/98.2       | 2299/96.6       | 1813/93.7       | 1647/93.9       | 1476/92.9       | 1717/93.5       | 1191/88.7       | 710/83.2       | 416/75.0       | 334/73.6       | 315/67.2       | 314/49.3     | 385/36.9      | 16162              |
| <i>C.aethiops</i>     | 1277/97.5                    | 2015/88.5       | 1743/73.3       | 975/50.4        | 548/31.2        | 304/19.1        | 132/7.2         | 68/5.1          | 29/3.4         | 11/2.0         | 10/2.2         | 2/0.4          | 1/0.2        | 0/0.0         | 7115               |
| <i>G.gorilla</i>      | 1287/98.2                    | 2139/94.0       | 2203/92.6       | 1750/90.4       | 1588/90.5       | 1436/90.4       | 1705/92.8       | 1206/89.9       | 746/87.5       | 439/79.1       | 325/71.6       | 321/68.4       | 439/68.9     | 662/63.5      | 16246              |
| <i>H.sapiens</i>      | 1307/99.8                    | 2237/98.3       | 2335/98.2       | 1875/96.9       | 1701/97.0       | 1540/97.0       | 1785/97.2       | 1287/95.9       | 773/90.6       | 480/86.5       | 379/83.5       | 352/75.1       | 469/73.6     | 709/68.0      | 17229              |
| <i>M.fascicularis</i> | 1301/99.3                    | 2229/97.9       | 2310/97.1       | 1852/95.7       | 1684/96.0       | 1509/95.0       | 1738/94.6       | 1242/92.5       | 702/82.3       | 382/68.8       | 178/39.2       | 80/17.1        | 23/3.6       | 6/0.6         | 15236              |
| <i>M.mulatta</i>      | 1275/97.3                    | 2134/93.8       | 2181/91.7       | 1747/90.3       | 1588/90.5       | 1429/90.0       | 1686/91.8       | 1178/87.8       | 709/83.1       | 423/76.2       | 339/74.7       | 329/70.1       | 422/66.2     | 631/60.6      | 16071              |
| <i>P.paniscus</i>     | 1301/99.3                    | 2202/96.7       | 2285/96.0       | 1850/95.6       | 1640/93.5       | 1485/93.5       | 1722/93.7       | 1209/90.1       | 646/75.7       | 331/59.6       | 178/39.2       | 69/14.7        | 27/4.2       | 6/0.6         | 14951              |
| <i>P.pygmaeus</i>     | 1295/98.9                    | 2178/95.7       | 2235/93.9       | 1788/92.4       | 1622/92.5       | 1458/91.8       | 1692/92.1       | 1195/89.0       | 699/81.9       | 425/76.6       | 316/69.6       | 326/69.5       | 450/70.6     | 635/60.9      | 16314              |
| <i>P.troglodytes</i>  | 1294/98.8                    | 2193/96.4       | 2269/95.4       | 1813/93.7       | 1634/93.2       | 1462/92.1       | 1735/94.4       | 1233/91.9       | 720/84.4       | 433/78.0       | 329/72.5       | 318/67.8       | 441/69.2     | 640/61.4      | 16514              |
| <i>A.cahirinus</i>    | 1271/97.0                    | 1773/77.9       | 1110/46.7       | 593/30.6        | 342/19.5        | 188/11.8        | 87/4.7          | 46/3.4          | 24/2.8         | 7/1.3          | 5/1.1          | 4/0.9          | 3/0.5        | 0/0.0         | 5453               |
| <i>C.porcellus</i>    | 1291/98.5                    | 2178/95.7       | 2255/94.8       | 1779/91.9       | 1585/90.4       | 1435/90.4       | 1672/91.0       | 1125/83.8       | 644/75.5       | 369/66.5       | 226/49.8       | 215/45.8       | 204/32.0     | 195/18.7      | 15173              |
| <i>H.glaber</i>       | 1303/99.5                    | 2236/98.2       | 2329/97.9       | 1877/97.0       | 1670/95.2       | 1500/94.5       | 1744/94.9       | 1212/90.3       | 627/73.5       | 313/56.4       | 149/32.8       | 89/19.0        | 44/6.9       | 11/1.1        | 15104              |
| <i>M.auratus</i>      | 1305/99.6                    | 2249/98.8       | 2314/97.3       | 1837/94.9       | 1570/89.5       | 1141/71.9       | 647/35.2        | 298/22.2        | 128/15.0       | 56/10.1        | 35/7.7         | 8/1.7          | 5/0.8        | 0/0.0         | 11593              |
| <i>M.unguiculatus</i> | 1306/99.7                    | 2237/98.3       | 2250/94.6       | 1743/90.1       | 1276/72.7       | 698/44.0        | 305/16.6        | 167/12.4        | 61/7.2         | 25/4.5         | 20/4.4         | 7/1.5          | 4/0.6        | 0/0.0         | 10099              |
| <i>M.musculus</i>     | 1309/99.9                    | 2234/98.2       | 2297/96.6       | 1832/94.7       | 1659/94.6       | 1497/94.3       | 1745/95.0       | 1246/92.8       | 736/86.3       | 443/79.8       | 336/74.0       | 318/67.8       | 317/49.8     | 352/33.8      | 16321              |
| <i>P.leucopus</i>     | 1303/99.5                    | 2242/98.5       | 2310/97.1       | 1812/93.6       | 1526/87.0       | 1102/69.4       | 599/32.6        | 275/20.5        | 129/15.1       | 66/11.9        | 26/5.7         | 15/3.2         | 8/1/2003     | 0/0.0         | 11413              |
| <i>R.norvegicus</i>   | 1268/96.8                    | 2109/92.7       | 2106/88.5       | 1702/88.0       | 1546/88.1       | 1397/88.0       | 1639/89.2       | 1161/86.5       | 677/79.4       | 404/72.8       | 309/68.1       | 306/65.2       | 310/48.7     | 372/35.7      | 15306              |
| <i>T.sibiricus</i>    | 1301/99.3                    | 2204/96.8       | 2170/91.2       | 1503/77.7       | 854/48.7        | 471/29.7        | 217/11.8        | 106/7.9         | 42/4.9         | 25/4.5         | 15/3.3         | 7/1.5          | 1/0.2        | 1/0.1         | 8917               |
| <i>S.murinus</i>      | 1263/96.4                    | 1814/79.7       | 1106/46.5       | 598/30.9        | 342/19.5        | 166/10.5        | 77/4.2          | 34/2.5          | 20/2.3         | 8/1.4          | 3/0.7          | 5/1.1          | 1/0.2        | 2/0.2         | 5439               |

<sup>1</sup> Column headers denote the numbers of individual species in COG and total number of COGs of a given size (in brackets).<sup>2</sup> Cells show the numbers of orthologs for each individual species and percentage from total number of COGs of a given size.<sup>3</sup> Total numbers of orthologs for each particular species.

Table S6. Life histories of 33 mammals.

| Common name           | Abbreviation | Gestation period (days) <sup>1</sup> | Weaning time (days) <sup>1</sup> | Adult weight (grams) <sup>1</sup> | Growth <sup>2</sup> | Time to maturity (days) <sup>1</sup> | Residual of <i>t</i> <sub>sex</sub> | Maximum lifespan (days) <sup>1</sup> | Residual of <i>t</i> <sub>max</sub> | Oxygen consumption (ml/gram) <sup>3</sup> |
|-----------------------|--------------|--------------------------------------|----------------------------------|-----------------------------------|---------------------|--------------------------------------|-------------------------------------|--------------------------------------|-------------------------------------|-------------------------------------------|
| Domestic cattle       | bta          | 277                                  | 180                              | 540000                            | 0.0031              | 365                                  | 0.254                               | 7997.15                              | 0.604                               | 0.17                                      |
| Domestic goat         | chi          | 155                                  | 160                              | 61000                             | 0.0041              | 685                                  | 0.763                               | 7358.4                               | 0.761                               | 0.19                                      |
| Domestic boar         | ssc          | 115                                  | 56                               | 180000                            | 0.0095              | 768                                  | 0.678                               | 7665                                 | 0.678                               | 0.11                                      |
| Domestic dog          | caf          | 63                                   | 56                               | 20000                             | 0.0244              | 510                                  | 0.723                               | 5840                                 | 0.709                               | 0.333                                     |
| Domestic cat          | fca          | 65                                   | 56                               | 3900                              | -                   | 210                                  | 0.423                               | 6205                                 | 0.953                               | 0.71                                      |
| Asian badger          | mle          | 49                                   | 90                               | 13000                             | 0.0196              | 365                                  | 0.568                               | 5913                                 | 0.763                               | 0.27                                      |
| American black bear   | uam          | 220                                  | 198                              | 154250                            | 0.0029              | 1278                                 | 1.166                               | 12410                                | 1.123                               | 0.36                                      |
| Greater tube-nosed    | mhi          | -                                    | -                                | 12.75                             | -                   | -                                    | -                                   | 3285                                 | 1.148                               | 1.42                                      |
| Brazilian free-tailed | tbr          | 78                                   | 42                               | 12.5                              | 0.112               | 547                                  | 3.799                               | 3650                                 | 1.280                               | 1.51                                      |
| Short-tailed          | mod          | 15                                   | 53                               | 105                               | -                   | 122                                  | 0.536                               | 1861.5                               | 0.481                               | 0.57                                      |
| Sugar glider          | pbr          | 16                                   | 122                              | 110                               | 0.0188              | 456                                  | 1.982                               | 5110                                 | 1.310                               | 0.69                                      |
| Hedgehog              | eeu          | 35                                   | 42                               | 750                               | -                   | 253                                  | 0.727                               | 4270.5                               | 0.831                               | 0.45                                      |
| Old World rabbit      | ocu          | 30                                   | 26                               | 1800                              | 0.0228              | 240                                  | 0.571                               | 3285                                 | 0.564                               | 0.57                                      |
| Duck-billed platypus  | oan          | 17                                   | 106                              | 1250                              | -                   | 548                                  | 1.411                               | 6205                                 | 1.122                               | 0.31                                      |
| Horse                 | eca          | 337                                  | 274                              | 350000                            | -                   | 973                                  | 0.744                               | 16790                                | 1.350                               | 0.25                                      |
| Vervet                | cae          | 162                                  | 182                              | 5620                              | -                   | 1825                                 | 3.400                               | 11242                                | 1.637                               | 0.306                                     |
| Gorilla               | ggo          | 256                                  | 834                              | 139842                            | 0.0008              | 4015                                 | 3.742                               | 16060                                | 1.473                               | 0.168                                     |
| Human                 | hsa          | 280                                  | 639                              | 70000                             | 0.0005              | 5110                                 | 5.528                               | 36500                                | 3.699                               | 0.21                                      |
| Long-tailed           | mfa          | 165                                  | 242                              | 6362                              | -                   | 1544                                 | 2.800                               | 13505                                | 1.932                               | 0.298                                     |
| Rhesus monkey         | mmu          | 165                                  | 292                              | 8235                              | 0.0012              | 2007                                 | 3.443                               | 14600                                | 2.013                               | 0.37                                      |
| Pygmy chimpanzee      | ppa          | 232                                  | 635                              | 39925                             | -                   | 3194                                 | 3.900                               | 18250                                | 2.005                               | 0.203                                     |
| Orangutan             | ppy          | 249                                  | 1003                             | 64475                             | 0.0009              | 2555                                 | 2.813                               | 21425.5                              | 2.197                               | 0.3                                       |
| Chimpanzee            | ptr          | 229                                  | 1111                             | 44983                             | 0.0007              | 2920                                 | 3.475                               | 19491                                | 2.105                               | 0.26                                      |
| Spiny mouse           | aca          | 38                                   | 14                               | 45                                | 0.0147              | 59                                   | 0.311                               | 2153.5                               | 0.628                               | 1.1                                       |
| Guinea pig            | cpo          | 68                                   | 18                               | 728                               | 0.0106              | 76                                   | 0.220                               | 4380                                 | 0.856                               | 0.55                                      |
| Naked mole-rat        | hgl          | 70                                   | 36                               | 35                                | 0.0046              | 365                                  | 2.031                               | 10329.5                              | 3.123                               | 0.66                                      |
| Golden hamster        | mau          | 16                                   | 20                               | 105                               | 0.0574              | 48                                   | 0.211                               | 1423.5                               | 0.367                               | 1.5                                       |
| Mongolian gerbil      | mun          | 25                                   | 24                               | 53.2                              | 0.0324              | 36                                   | 0.183                               | 1387                                 | 0.395                               | 1.15                                      |
| House mouse           | mus          | 19                                   | 22                               | 20.5                              | 0.0298              | 42                                   | 0.262                               | 1460                                 | 0.477                               | 1.667                                     |
| White-footed mouse    | ple          | 26                                   | 22                               | 23                                | 0.0456              | 44                                   | 0.268                               | 2883.5                               | 0.926                               | 2.2                                       |
| Norway rat            | rno          | 21                                   | 25                               | 300                               | -                   | 70                                   | 0.245                               | 1825                                 | 0.405                               | 1.32                                      |
| Siberian chipmunk     | tsi          | 35                                   | 40                               | 85                                | -                   | 350                                  | 1.609                               | 3504                                 | 0.933                               | 1.25                                      |
| House shrew           | smu          | 30                                   | 19                               | 45                                | 0.0643              | 36                                   | 0.190                               | 1168                                 | 0.341                               | 1.97                                      |

<sup>1</sup> Life histories were collected from published literature and AnAge database ([www.genomics.senescence.info](http://www.genomics.senescence.info)).<sup>2</sup> An estimate of Gompertz function defining the fraction of body weight accumulating per day (data from AnAge).<sup>3</sup> Oxygen consumption is the volume of oxygen (ml) consumed in 1 hour. Here, the data are adjusted by species body weight (grams).

Table S7. Lambda parameter estimates and associated statistics for life histories.

| Life history                     | $\lambda$ | $\ln L(\lambda)^1$ | $\ln L(\lambda=0)^2$ | $\ln L(\lambda=1)^3$ | $P(\lambda=0)^4$ | $P(\lambda=1)^5$ |
|----------------------------------|-----------|--------------------|----------------------|----------------------|------------------|------------------|
| Gestation period                 | 0.65      | -44.7              | -46.6                | -47.3                | 4.90e-02         | 2.30e-02         |
| Weaning time                     | 0.37      | -49.9              | -50.6                | -57.6                | 2.40e-01         | 8.60e-05         |
| Adult weight                     | 0.39      | -79.3              | -79.7                | -84.1                | 3.50e-01         | 2.00e-03         |
| Growth rate                      | 1         | -40.6              | -49.6                | -40.6                | 2.10e-05         | 1.00e+00         |
| Time to maturity ( <i>tsex</i> ) | 0.72      | -51.2              | -54.7                | -54.1                | 8.30e-03         | 1.60e-02         |
| Residual of <i>tsex</i>          | 0.72      | -45.6              | -47.5                | -47.6                | 5.00e-02         | 4.70e-02         |
| Maximum lifespan ( <i>tmax</i> ) | 0.65      | -42.4              | -44                  | -44.9                | 7.70e-02         | 2.50e-02         |
| Residual of <i>tmax</i>          | 0.64      | -33.9              | -34.2                | -34.8                | 4.90e-01         | 1.90e-01         |
| Oxygen consumption               | 0.41      | -39.4              | -40                  | -42.8                | 2.70e-01         | 9.00e-03         |

<sup>1</sup> log-likelihoods of the  $\lambda$  model.

<sup>2</sup> log-likelihoods of the "noise" model (phylogenetic tree with  $\lambda=0$ ).

<sup>3</sup> log-likelihoods of the Brownian motion (BM) model.

<sup>4</sup> Significance of difference of the  $\lambda$  model from noise (LRT).

<sup>5</sup> Significance of difference of the  $\lambda$  model from the BM (LRT).

Table S8. Statistics for genes whose expression variation is consistent with the BM model.

| Model <sup>1</sup>    | Liver ( <i>n</i> = 12835) <sup>2</sup> |              | Kidney ( <i>n</i> = 13859) |              | Brain ( <i>n</i> = 14091) |              | Combined <sup>4</sup> |
|-----------------------|----------------------------------------|--------------|----------------------------|--------------|---------------------------|--------------|-----------------------|
|                       | Nb. of genes <sup>3</sup>              | % from total | Nb. of genes               | % from total | Nb. of genes              | % from total |                       |
| BM ( <i>P</i> < 0.05) | 837 (518)                              | 6.5 (4.0)    | 1994 (1190)                | 14.4 (8.6)   | 2346 (1555)               | 16.6 (11.0)  | 4182 (76)             |
| BM ( <i>P</i> < 0.01) | 625 (412)                              | 4.9 (3.2)    | 1637 (1002)                | 11.8 (7.2)   | 1976 (1340)               | 14.0 (9.5)   | 3471 (50)             |

<sup>1</sup> *P* denotes significance of a difference from randomly distributed value (no effect of phylogeny).

<sup>2</sup> *n* denotes total number of orthologous groups assayed in the analysis.

<sup>3</sup> Number of significant genes and number of genes specific for an organ (in brackets).

<sup>4</sup> Number of significant genes identified in three organs and inter-organ overlap (in brackets).

Table S9. Statistics for genes whose expression variation is consistent with the OU model.

| Taxonomic group                                      | Liver ( <i>n</i> = 6446) <sup>1</sup> |              | Kidney ( <i>n</i> = 5424) |              | Brain ( <i>n</i> = 5442) |              | Combined <sup>4</sup> |
|------------------------------------------------------|---------------------------------------|--------------|---------------------------|--------------|--------------------------|--------------|-----------------------|
|                                                      | Nb. of genes <sup>2</sup>             | % from total | Nb. of genes              | % from total | Nb. of genes             | % from total |                       |
| Primates                                             | 254 (208)                             | 3.9 (3.2)    | 183 (137)                 | 3.4 (2.5)    | 204 (168)                | 3.7 (3.1)    | 574 (6)               |
| Hominidae                                            | 145 (124)                             | 2.2 (1.9)    | 160 (117)                 | 2.9 (2.1)    | 310 (266)                | 5.7 (4.9)    | 558 (6)               |
| Rodentia                                             | 160 (137)                             | 2.5 (2.1)    | 114 (90)                  | 2.1 (1.6)    | 161 (141)                | 3.0 (2.6)    | 401 (1)               |
| Eumuroida                                            | 106 (91)                              | 1.6 (1.4)    | 100 (84)                  | 1.8 (1.5)    | 114 (99)                 | 2.1 (1.8)    | 297 (0)               |
| Chiroptera                                           | 87 (76)                               | 1.3 (1.2)    | 148 (132)                 | 2.7 (2.4)    | 52 (40)                  | 1.0 (0.7)    | 266 (3)               |
| Laurasiatheria                                       | 71 (64)                               | 1.1 (1.0)    | 58 (49)                   | 1.1 (0.9)    | 105 (97)                 | 1.9 (1.8)    | 222 (0)               |
| Rodentia and Lagomorpha                              | 87 (77)                               | 1.3 (1.2)    | 78 (67)                   | 1.4 (1.2)    | 62 (55)                  | 1.1 (1.0)    | 213 (0)               |
| Euungulata and Carnivora                             | 58 (48)                               | 0.9 (0.7)    | 70 (61)                   | 1.3 (1.1)    | 55 (52)                  | 1.0 (0.9)    | 172 (0)               |
| Chiroptera, Laurasiatheria, Euungulata and Carnivora | 70 (63)                               | 1.1 (1.0)    | 47 (38)                   | 0.9 (0.7)    | 48 (40)                  | 0.9 (0.7)    | 153 (0)               |
| Lagomorpha                                           | 47 (41)                               | 0.7 (0.6)    | 33 (23)                   | 0.6 (0.4)    | 65 (55)                  | 1.2 (1.0)    | 131 (2)               |
| Hystricognathi                                       | 49 (45)                               | 0.8 (0.7)    | 34 (30)                   | 0.6 (0.5)    | 44 (40)                  | 0.8 (0.7)    | 121 (0)               |
| Chiroptera, Euungulata and Carnivora                 | 41 (38)                               | 0.6 (0.6)    | 45 (40)                   | 0.8 (0.7)    | 41 (38)                  | 0.8 (0.7)    | 121 (1)               |
| Euungulata                                           | 35 (31)                               | 0.5 (0.5)    | 29 (25)                   | 0.5 (0.5)    | 52 (51)                  | 1.0 (0.9)    | 111 (1)               |
| Cercopithecoidea                                     | 41 (37)                               | 0.6 (0.6)    | 38 (32)                   | 0.7 (0.6)    | 36 (30)                  | 0.7 (0.5)    | 106 (2)               |
| Carnivora                                            | 42 (36)                               | 0.7 (0.6)    | 43 (36)                   | 0.8 (0.7)    | 27 (26)                  | 0.5 (0.5)    | 105 (0)               |
| Combined <sup>3</sup>                                | 1293 (1166)                           | 19.8 (17.3)  | 1180 (961)                | 21.6 (17.7)  | 1376 (1198)              | 25.4 (22.0)  | 3551 (22)             |

<sup>1</sup> *n* denotes total number of orthologous groups assayed in the analysis.

<sup>2</sup> Number of genes identified in the organ and number of genes specific for an organ (in brackets).

<sup>3</sup> Number of genes identified in the organ for all lineages and number of genes specific for an organ (in brackets).

<sup>4</sup> Number of genes identified in three organs for all lineages and inter-organ overlap (in brackets).
